# Supplementary material for: H-RACS: a handy tool to rank anti-cancer synergistic drugs
Source: publisher site journal article supplement (doi:10.18632/aging.103925), 2020-11-07
Supplement: Supplementary file [file aging-v12i21-103925-supplementary-material-SD4.pdf]

SUPPLEMENTARY FIGURES

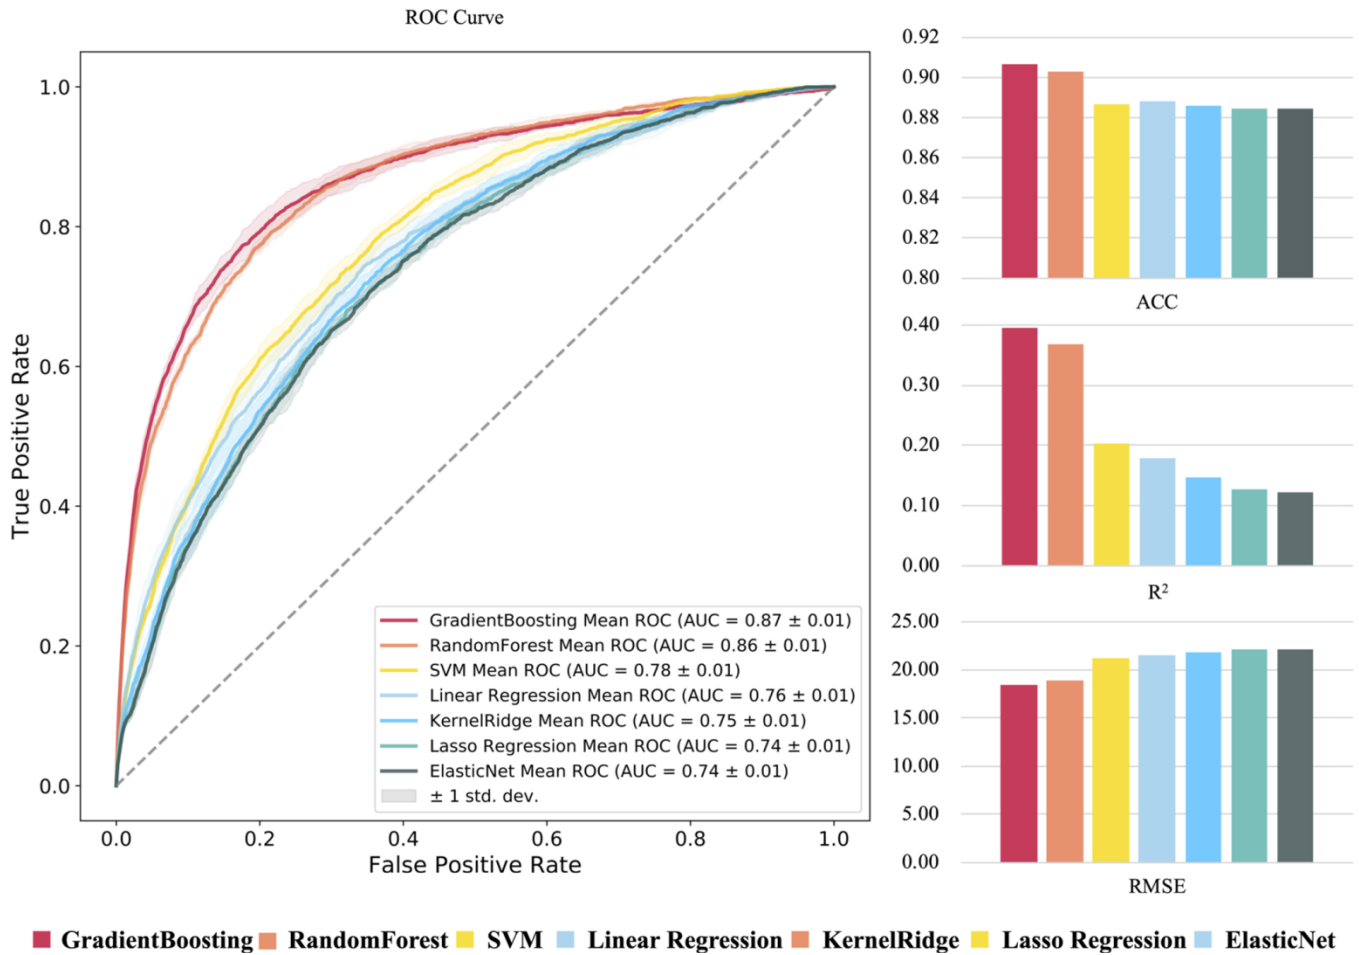

Supplementary Figure 1. The performance comparison of seven models based on five-fold cross-validation on the internal training dataset.

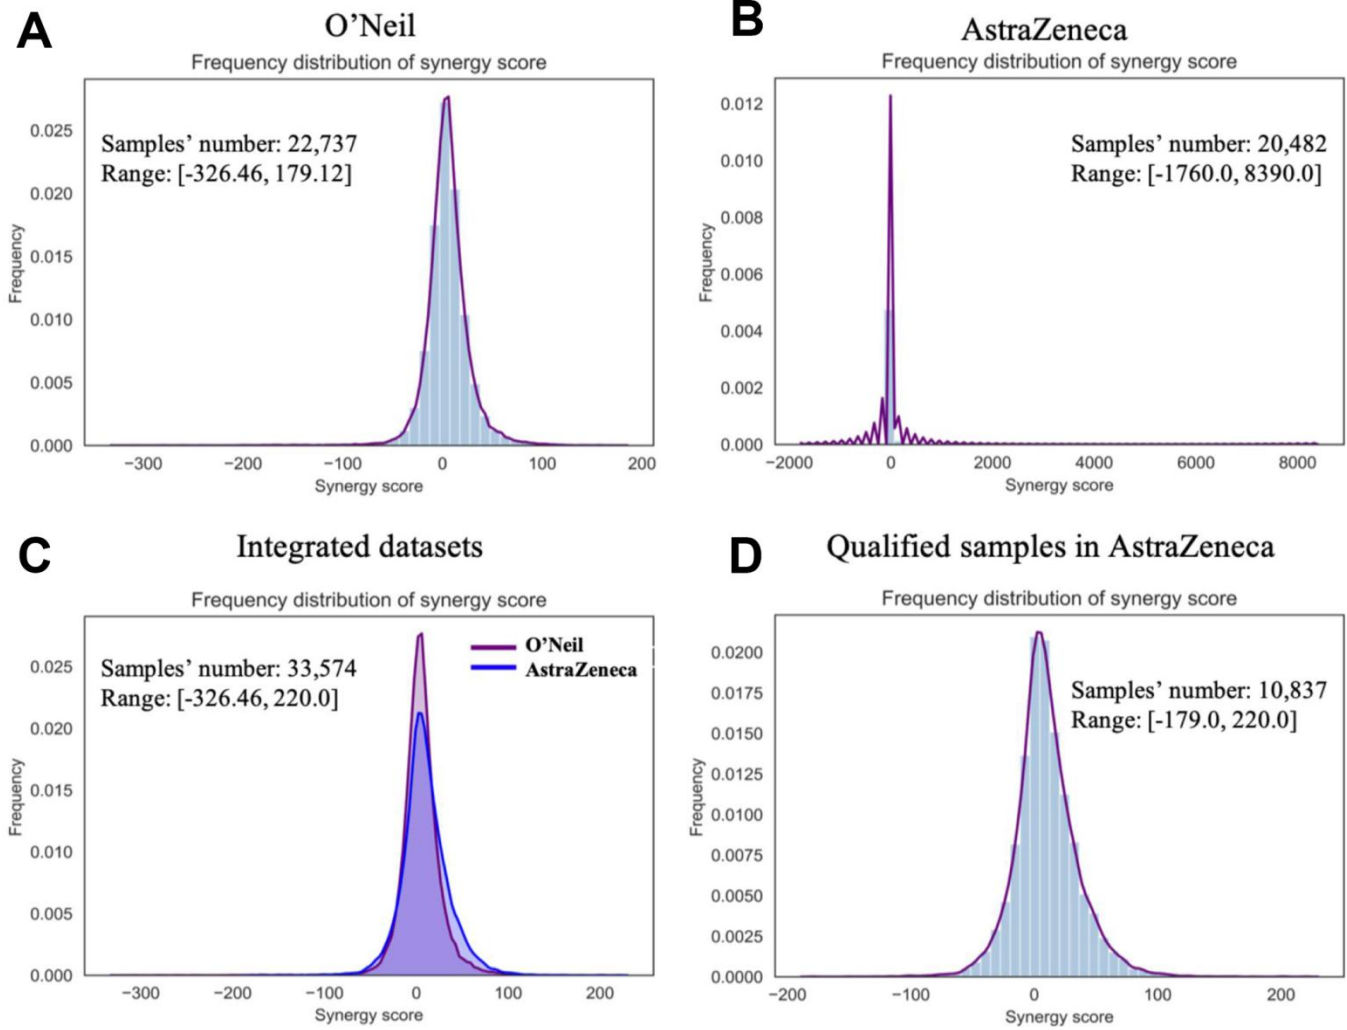

**Supplementary Figure 2. Frequency distributions of synergy scores of A&O datasets.** (A) Frequency distribution of synergy score of O'Neil dataset; (B) Frequency distribution of synergy score of AstraZeneca dataset; (C) Frequency distribution of synergy score of A&O dataset; (D) Frequency distribution of synergy score of qualified samples in AstraZeneca dataset.
