# Supplementary material for: H-RACS: a handy tool to rank anti-cancer synergistic drugs
Source: Aging (Albany NY). 2020 Nov 10;12(21):21504–17. doi: 10.18632/aging.103925 (PMC7695372; doi:10.18632/aging.103925)
Supplement: Supplementary Table 4 [file aging-12-103925-s003..xlsx]

## Sheet: SynergyScore_of_Scenarios
Sample	SynergyScore	label(0-train, 1-test)
METFORMIN_TEMOZOLOMIDE_LNCAP	-4.15534	0
METFORMIN_TEMOZOLOMIDE_KPL1	-20.6655	0
METFORMIN_TEMOZOLOMIDE_A375	-3.79476	0
METFORMIN_TEMOZOLOMIDE_DLD1	-4.41658	0
METFORMIN_TEMOZOLOMIDE_SKOV3	-14.1013	0
METFORMIN_TEMOZOLOMIDE_RKO	0.827358	0
METFORMIN_TEMOZOLOMIDE_A427	-5.56047	0
METFORMIN_TEMOZOLOMIDE_EFM192B	-30.5153	0
METFORMIN_TEMOZOLOMIDE_HT29	-1.39399	0
METFORMIN_TEMOZOLOMIDE_UACC62	-5.56217	0
METFORMIN_TEMOZOLOMIDE_SW620	-0.723836	0
METFORMIN_TEMOZOLOMIDE_ES2	-2.17973	0
METFORMIN_TEMOZOLOMIDE_MDAMB436	-2.01643	0
METFORMIN_TEMOZOLOMIDE_RPMI7951	4.33199	0
METFORMIN_TEMOZOLOMIDE_LOVO	-5.98967	0
METFORMIN_TEMOZOLOMIDE_HT144	-10.421	0
METFORMIN_TEMOZOLOMIDE_NCIH2122	-3.05776	0
METFORMIN_TEMOZOLOMIDE_OV90	-2.28983	0
METFORMIN_TEMOZOLOMIDE_COLO320DM	1.59449	0
METFORMIN_TEMOZOLOMIDE_UWB1289BRCA1	5.14079	0
METFORMIN_TEMOZOLOMIDE_HCT116	-5.32535	0
METFORMIN_TEMOZOLOMIDE_NCIH460	-9.90198	0
METFORMIN_TEMOZOLOMIDE_UWB1289	6.95332	0
METFORMIN_ABT-888_A375	-9.09285	0
METFORMIN_ABT-888_DLD1	-2.18122	0
METFORMIN_ABT-888_NCIH1650	-7.39471	0
METFORMIN_ABT-888_SKOV3	-1.53647	0
METFORMIN_ABT-888_OCUBM	-0.104952	0
METFORMIN_ABT-888_A2058	8.23601	0
METFORMIN_ABT-888_RKO	-4.94638	0
METFORMIN_ABT-888_A427	-11.7191	0
METFORMIN_ABT-888_A2780	-0.383517	0
METFORMIN_ABT-888_NCIH520	-2.91271	0
METFORMIN_ABT-888_PA1	2.01275	0
METFORMIN_ABT-888_T47D	-24.0716	0
METFORMIN_ABT-888_UACC62	-8.28523	0
METFORMIN_ABT-888_SW620	-3.00964	0
METFORMIN_ABT-888_LOVO	-5.39105	0
METFORMIN_ABT-888_OVCAR3	6.42492	0
METFORMIN_ABT-888_ZR751	-16.5677	0
METFORMIN_ABT-888_HT144	-7.00662	0
METFORMIN_ABT-888_NCIH2122	-5.35628	0
METFORMIN_ABT-888_COLO320DM	-1.655	0
METFORMIN_ABT-888_NCIH23	-3.19812	0
METFORMIN_ABT-888_UWB1289BRCA1	-1.56309	0
METFORMIN_ABT-888_HCT116	-0.455075	0
METFORMIN_ZOLINZA_KPL1	2.98375	0
METFORMIN_ZOLINZA_A375	3.3526	0
METFORMIN_ZOLINZA_DLD1	7.15168	0
METFORMIN_ZOLINZA_NCIH1650	7.31236	0
METFORMIN_ZOLINZA_SKOV3	15.1105	0
METFORMIN_ZOLINZA_RKO	8.39747	0
METFORMIN_ZOLINZA_A427	-17.1474	0
METFORMIN_ZOLINZA_A2780	7.43764	0
METFORMIN_ZOLINZA_SKMEL30	2.42281	0
METFORMIN_ZOLINZA_HT29	11.1967	0
METFORMIN_ZOLINZA_T47D	55.6311	0
METFORMIN_ZOLINZA_SKMES1	7.08799	0
METFORMIN_ZOLINZA_ES2	-4.6674	0
METFORMIN_ZOLINZA_RPMI7951	5.13617	0
METFORMIN_ZOLINZA_LOVO	1.45626	0
METFORMIN_ZOLINZA_OVCAR3	15.6253	0
METFORMIN_ZOLINZA_ZR751	-17.722	0
METFORMIN_ZOLINZA_SW837	6.90453	0
METFORMIN_ZOLINZA_NCIH2122	5.54607	0
METFORMIN_ZOLINZA_COLO320DM	9.73719	0
METFORMIN_ZOLINZA_NCIH23	-5.78824	0
METFORMIN_ZOLINZA_UWB1289BRCA1	-0.909312	0
METFORMIN_ZOLINZA_HCT116	0.0779921	0
METFORMIN_ZOLINZA_NCIH460	-4.58445	0
METFORMIN_ZOLINZA_CAOV3	3.91161	0
METFORMIN_MK-4827_LNCAP	-2.61435	0
METFORMIN_MK-4827_KPL1	0.238522	0
METFORMIN_MK-4827_A375	1.58388	0
METFORMIN_MK-4827_DLD1	0.716341	0
METFORMIN_MK-4827_NCIH1650	8.35408	0
METFORMIN_MK-4827_VCAP	16.2111	0
METFORMIN_MK-4827_OCUBM	18.8632	0
METFORMIN_MK-4827_RKO	9.71911	0
METFORMIN_MK-4827_A2780	9.11008	0
METFORMIN_MK-4827_EFM192B	4.54097	0
METFORMIN_MK-4827_SKMEL30	3.81841	0
METFORMIN_MK-4827_NCIH520	-0.737404	0
METFORMIN_MK-4827_T47D	22.7947	0
METFORMIN_MK-4827_SKMES1	6.66877	0
METFORMIN_MK-4827_ES2	-0.877714	0
METFORMIN_MK-4827_RPMI7951	4.12551	0
METFORMIN_MK-4827_LOVO	-7.31876	0
METFORMIN_MK-4827_MSTO	-5.34437	0
METFORMIN_MK-4827_OVCAR3	16.7264	0
METFORMIN_MK-4827_HT144	3.8369	0
METFORMIN_MK-4827_SW837	-14.7779	0
METFORMIN_MK-4827_OV90	-0.975292	0
METFORMIN_MK-4827_NCIH23	-1.66053	0
METFORMIN_MK-4827_UWB1289BRCA1	-2.69713	0
METFORMIN_MK-4827_HCT116	5.68531	0
METFORMIN_MK-4827_NCIH460	3.18674	0
METFORMIN_MK-4827_UWB1289	4.1874	0
METFORMIN_MK-8776_KPL1	-11.6307	0
METFORMIN_MK-8776_A375	-1.41682	0
METFORMIN_MK-8776_DLD1	0.275229	0
METFORMIN_MK-8776_OCUBM	10.4609	0
METFORMIN_MK-8776_RKO	4.11154	0
METFORMIN_MK-8776_A427	-9.75798	0
METFORMIN_MK-8776_EFM192B	9.53088	0
METFORMIN_MK-8776_HT29	-1.3743	0
METFORMIN_MK-8776_NCIH520	-6.44929	0
METFORMIN_MK-8776_T47D	10.8475	0
METFORMIN_MK-8776_UACC62	-3.80421	0
METFORMIN_MK-8776_SW620	1.43937	0
METFORMIN_MK-8776_SKMES1	-0.741067	0
METFORMIN_MK-8776_ES2	-7.42746	0
METFORMIN_MK-8776_MDAMB436	3.7991	0
METFORMIN_MK-8776_MSTO	-38.4565	0
METFORMIN_MK-8776_OVCAR3	1.78971	0
METFORMIN_MK-8776_ZR751	-37.6463	0
METFORMIN_MK-8776_HT144	11.6151	0
METFORMIN_MK-8776_NCIH2122	-9.79125	0
METFORMIN_MK-8776_OV90	3.13602	0
METFORMIN_MK-8776_COLO320DM	3.78465	0
METFORMIN_MK-8776_NCIH23	7.50848	0
METFORMIN_MK-8776_UWB1289BRCA1	-9.3635	0
METFORMIN_MK-8776_NCIH460	-11.6439	0
METFORMIN_BORTEZOMIB_KPL1	-31.5366	0
METFORMIN_BORTEZOMIB_A375	9.4959	0
METFORMIN_BORTEZOMIB_DLD1	7.18898	0
METFORMIN_BORTEZOMIB_NCIH1650	-31.1326	0
METFORMIN_BORTEZOMIB_SKOV3	-14.7538	0
METFORMIN_BORTEZOMIB_VCAP	-18.1278	0
METFORMIN_BORTEZOMIB_A2058	-20.4669	0
METFORMIN_BORTEZOMIB_RKO	-19.693	0
METFORMIN_BORTEZOMIB_A427	-16.5314	0
METFORMIN_BORTEZOMIB_A2780	-16.4107	0
METFORMIN_BORTEZOMIB_SKMEL30	-8.58908	0
METFORMIN_BORTEZOMIB_HT29	-18.449	0
METFORMIN_BORTEZOMIB_NCIH520	-17.2146	0
METFORMIN_BORTEZOMIB_PA1	3.69595	0
METFORMIN_BORTEZOMIB_UACC62	-9.21806	0
METFORMIN_BORTEZOMIB_SW620	-5.08927	0
METFORMIN_BORTEZOMIB_ES2	2.02288	0
METFORMIN_BORTEZOMIB_LOVO	-3.95537	0
METFORMIN_BORTEZOMIB_OVCAR3	-1.18156	0
METFORMIN_BORTEZOMIB_ZR751	-21.0443	0
METFORMIN_BORTEZOMIB_HT144	-7.95012	0
METFORMIN_BORTEZOMIB_SW837	-4.4794	0
METFORMIN_BORTEZOMIB_NCIH2122	0.348994	0
METFORMIN_BORTEZOMIB_COLO320DM	-32.6382	0
METFORMIN_BORTEZOMIB_UWB1289BRCA1	-5.03807	0
METFORMIN_BORTEZOMIB_HCT116	-3.26492	0
METFORMIN_BORTEZOMIB_CAOV3	-8.0271	0
METFORMIN_ERLOTINIB_LNCAP	6.11762	0
METFORMIN_ERLOTINIB_A375	1.0175	0
METFORMIN_ERLOTINIB_DLD1	7.60956	0
METFORMIN_ERLOTINIB_OCUBM	6.18577	0
METFORMIN_ERLOTINIB_A2058	4.93884	0
METFORMIN_ERLOTINIB_RKO	-12.1614	0
METFORMIN_ERLOTINIB_A427	-2.06165	0
METFORMIN_ERLOTINIB_A2780	0.697901	0
METFORMIN_ERLOTINIB_EFM192B	3.27306	0
METFORMIN_ERLOTINIB_SKMEL30	-6.19687	0
METFORMIN_ERLOTINIB_T47D	22.875	0
METFORMIN_ERLOTINIB_UACC62	10.3344	0
METFORMIN_ERLOTINIB_SW620	-7.55506	0
METFORMIN_ERLOTINIB_SKMES1	5.5091	0
METFORMIN_ERLOTINIB_ES2	-7.61104	0
METFORMIN_ERLOTINIB_MDAMB436	4.72177	0
METFORMIN_ERLOTINIB_ZR751	11.2021	0
METFORMIN_ERLOTINIB_HT144	-3.47286	0
METFORMIN_ERLOTINIB_NCIH2122	1.36767	0
METFORMIN_ERLOTINIB_COLO320DM	-2.21932	0
METFORMIN_ERLOTINIB_UWB1289	14.6394	0
METFORMIN_DINACICLIB_LNCAP	22.309	0
METFORMIN_DINACICLIB_A375	4.40151	0
METFORMIN_DINACICLIB_DLD1	5.95882	0
METFORMIN_DINACICLIB_NCIH1650	23.124	0
METFORMIN_DINACICLIB_VCAP	2.46416	0
METFORMIN_DINACICLIB_OCUBM	-9.8299	0
METFORMIN_DINACICLIB_A2058	2.41586	0
METFORMIN_DINACICLIB_EFM192B	6.09608	0
METFORMIN_DINACICLIB_NCIH520	-4.55365	0
METFORMIN_DINACICLIB_PA1	-3.4703	0
METFORMIN_DINACICLIB_UACC62	-12.5745	0
METFORMIN_DINACICLIB_SW620	2.44637	0
METFORMIN_DINACICLIB_SKMES1	4.29996	0
METFORMIN_DINACICLIB_ES2	-7.59524	0
METFORMIN_DINACICLIB_MDAMB436	3.95748	0
METFORMIN_DINACICLIB_LOVO	-4.71255	0
METFORMIN_DINACICLIB_MSTO	0.327044	0
METFORMIN_DINACICLIB_OVCAR3	5.65964	0
METFORMIN_DINACICLIB_HT144	-7.73614	0
METFORMIN_DINACICLIB_SW837	-6.67991	0
METFORMIN_DINACICLIB_NCIH2122	4.6034	0
METFORMIN_DINACICLIB_UWB1289BRCA1	-4.86911	0
METFORMIN_DINACICLIB_HCT116	-5.77141	0
METFORMIN_DINACICLIB_NCIH460	-1.6393	0
METFORMIN_DINACICLIB_UWB1289	-0.643899	0
METFORMIN_SUNITINIB_LNCAP	-0.0488042	0
METFORMIN_SUNITINIB_KPL1	8.87961	0
METFORMIN_SUNITINIB_A375	7.97817	0
METFORMIN_SUNITINIB_DLD1	5.51999	0
METFORMIN_SUNITINIB_NCIH1650	5.72208	0
METFORMIN_SUNITINIB_OCUBM	7.96973	0
METFORMIN_SUNITINIB_A2058	7.38816	0
METFORMIN_SUNITINIB_RKO	8.65049	0
METFORMIN_SUNITINIB_A427	8.06555	0
METFORMIN_SUNITINIB_EFM192B	13.5988	0
METFORMIN_SUNITINIB_SKMEL30	3.58878	0
METFORMIN_SUNITINIB_HT29	5.93338	0
METFORMIN_SUNITINIB_PA1	7.48697	0
METFORMIN_SUNITINIB_T47D	18.8762	0
METFORMIN_SUNITINIB_SW620	2.93442	0
METFORMIN_SUNITINIB_ES2	2.76662	0
METFORMIN_SUNITINIB_MDAMB436	4.41764	0
METFORMIN_SUNITINIB_RPMI7951	-3.5984	0
METFORMIN_SUNITINIB_LOVO	1.19982	0
METFORMIN_SUNITINIB_MSTO	1.64289	0
METFORMIN_SUNITINIB_OV90	6.50521	0
METFORMIN_SUNITINIB_NCIH23	2.7911	0
METFORMIN_SUNITINIB_UWB1289BRCA1	2.91425	0
METFORMIN_SUNITINIB_NCIH460	-0.0781632	0
METFORMIN_L778123_LNCAP	15.3316	0
METFORMIN_L778123_KPL1	-11.3883	0
METFORMIN_L778123_DLD1	5.66169	0
METFORMIN_L778123_NCIH1650	-4.92843	0
METFORMIN_L778123_VCAP	5.0908	0
METFORMIN_L778123_A427	6.30037	0
METFORMIN_L778123_A2780	4.45863	0
METFORMIN_L778123_EFM192B	10.6673	0
METFORMIN_L778123_SKMEL30	10.4545	0
METFORMIN_L778123_HT29	7.26574	0
METFORMIN_L778123_NCIH520	6.53261	0
METFORMIN_L778123_PA1	6.1848	0
METFORMIN_L778123_SW620	0.822841	0
METFORMIN_L778123_SKMES1	7.00768	0
METFORMIN_L778123_ES2	4.08018	0
METFORMIN_L778123_MDAMB436	5.14596	0
METFORMIN_L778123_OVCAR3	-6.84821	0
METFORMIN_L778123_ZR751	-10.0959	0
METFORMIN_L778123_SW837	1.38079	0
METFORMIN_L778123_NCIH2122	6.53073	0
METFORMIN_L778123_OV90	9.89761	0
METFORMIN_L778123_COLO320DM	-0.644859	0
METFORMIN_L778123_HCT116	-4.48319	0
METFORMIN_L778123_NCIH460	3.1889	0
METFORMIN_L778123_CAOV3	12.7614	0
METFORMIN_L778123_UWB1289	18.4862	0
METFORMIN_MK-2206_KPL1	15.0145	0
METFORMIN_MK-2206_A375	3.04508	0
METFORMIN_MK-2206_NCIH1650	-1.62971	0
METFORMIN_MK-2206_SKOV3	8.3862	0
METFORMIN_MK-2206_OCUBM	1.18195	0
METFORMIN_MK-2206_A2058	12.7567	0
METFORMIN_MK-2206_A2780	10.3143	0
METFORMIN_MK-2206_EFM192B	-6.073	0
METFORMIN_MK-2206_HT29	-0.452404	0
METFORMIN_MK-2206_NCIH520	3.59567	0
METFORMIN_MK-2206_PA1	5.67509	0
METFORMIN_MK-2206_T47D	51.1842	0
METFORMIN_MK-2206_UACC62	-3.48163	0
METFORMIN_MK-2206_SW620	1.16646	0
METFORMIN_MK-2206_SKMES1	-0.232328	0
METFORMIN_MK-2206_ES2	2.63379	0
METFORMIN_MK-2206_MDAMB436	4.77167	0
METFORMIN_MK-2206_RPMI7951	1.83765	0
METFORMIN_MK-2206_LOVO	-4.86589	0
METFORMIN_MK-2206_OVCAR3	-4.98072	0
METFORMIN_MK-2206_SW837	-7.80205	0
METFORMIN_MK-2206_NCIH2122	-2.17267	0
METFORMIN_MK-2206_COLO320DM	5.47151	0
METFORMIN_MK-2206_NCIH23	-1.21895	0
METFORMIN_MK-2206_UWB1289BRCA1	-7.79869	0
METFORMIN_MK-2206_HCT116	2.21972	0
METFORMIN_MK-2206_NCIH460	-12.9086	0
METFORMIN_MK-2206_CAOV3	-8.35953	0
METFORMIN_MK-2206_UWB1289	10.442	0
METFORMIN_MK-4541_LNCAP	-2.80181	0
METFORMIN_MK-4541_KPL1	-3.61142	0
METFORMIN_MK-4541_A375	-8.60567	0
METFORMIN_MK-4541_DLD1	-1.62445	0
METFORMIN_MK-4541_VCAP	17.6323	0
METFORMIN_MK-4541_OCUBM	-2.19596	0
METFORMIN_MK-4541_A2058	4.37295	0
METFORMIN_MK-4541_A427	-10.7958	0
METFORMIN_MK-4541_A2780	0.507384	0
METFORMIN_MK-4541_EFM192B	-18.2171	0
METFORMIN_MK-4541_HT29	-1.67779	0
METFORMIN_MK-4541_PA1	-1.66943	0
METFORMIN_MK-4541_T47D	32.364	0
METFORMIN_MK-4541_UACC62	-28.5711	0
METFORMIN_MK-4541_SKMES1	-2.54585	0
METFORMIN_MK-4541_ES2	-7.63898	0
METFORMIN_MK-4541_RPMI7951	-23.7864	0
METFORMIN_MK-4541_LOVO	-19.0405	0
METFORMIN_MK-4541_MSTO	1.05879	0
METFORMIN_MK-4541_OVCAR3	-26.2873	0
METFORMIN_MK-4541_ZR751	-40.9699	0
METFORMIN_MK-4541_HT144	-21.5287	0
METFORMIN_MK-4541_SW837	-14.2922	0
METFORMIN_MK-4541_OV90	-4.70172	0
METFORMIN_MK-4541_COLO320DM	2.24878	0
METFORMIN_MK-4541_UWB1289BRCA1	-17.3387	0
METFORMIN_MK-4541_HCT116	-6.39075	0
METFORMIN_MK-4541_NCIH460	-19.4461	0
METFORMIN_MK-5108_LNCAP	0.177241	0
METFORMIN_MK-5108_KPL1	-4.34531	0
METFORMIN_MK-5108_A375	8.55238	0
METFORMIN_MK-5108_DLD1	3.16619	0
METFORMIN_MK-5108_NCIH1650	2.77799	0
METFORMIN_MK-5108_SKOV3	9.26912	0
METFORMIN_MK-5108_VCAP	10.5146	0
METFORMIN_MK-5108_A2058	2.60479	0
METFORMIN_MK-5108_RKO	9.30005	0
METFORMIN_MK-5108_A427	-3.78917	0
METFORMIN_MK-5108_A2780	6.24575	0
METFORMIN_MK-5108_EFM192B	-2.7373	0
METFORMIN_MK-5108_HT29	2.37821	0
METFORMIN_MK-5108_PA1	1.76171	0
METFORMIN_MK-5108_UACC62	2.24689	0
METFORMIN_MK-5108_SW620	3.50154	0
METFORMIN_MK-5108_RPMI7951	2.98892	0
METFORMIN_MK-5108_LOVO	-8.19849	0
METFORMIN_MK-5108_MSTO	-2.61882	0
METFORMIN_MK-5108_OVCAR3	-9.99817	0
METFORMIN_MK-5108_ZR751	-11.5133	0
METFORMIN_MK-5108_NCIH2122	3.07565	0
METFORMIN_MK-5108_OV90	2.55894	0
METFORMIN_MK-5108_COLO320DM	5.29873	0
METFORMIN_MK-5108_NCIH23	8.12611	0
METFORMIN_MK-5108_UWB1289BRCA1	1.20764	0
METFORMIN_MK-5108_HCT116	-0.517199	0
METFORMIN_MK-5108_NCIH460	-9.35414	0
METFORMIN_MK-5108_CAOV3	-10.5344	0
METFORMIN_MK-5108_UWB1289	1.885	0
METFORMIN_SORAFENIB_KPL1	-1.78754	0
METFORMIN_SORAFENIB_A375	13.368	0
METFORMIN_SORAFENIB_NCIH1650	4.55956	0
METFORMIN_SORAFENIB_VCAP	7.44702	0
METFORMIN_SORAFENIB_OCUBM	10.7444	0
METFORMIN_SORAFENIB_A2058	16.7756	0
METFORMIN_SORAFENIB_A2780	5.40014	0
METFORMIN_SORAFENIB_EFM192B	7.08983	0
METFORMIN_SORAFENIB_NCIH520	10.988	0
METFORMIN_SORAFENIB_T47D	9.98887	0
METFORMIN_SORAFENIB_UACC62	8.63389	0
METFORMIN_SORAFENIB_SW620	10.226	0
METFORMIN_SORAFENIB_SKMES1	15.8297	0
METFORMIN_SORAFENIB_ES2	4.65344	0
METFORMIN_SORAFENIB_MDAMB436	4.11172	0
METFORMIN_SORAFENIB_RPMI7951	3.98142	0
METFORMIN_SORAFENIB_LOVO	-3.26375	0
METFORMIN_SORAFENIB_MSTO	-9.13986	0
METFORMIN_SORAFENIB_ZR751	-18.504	0
METFORMIN_SORAFENIB_HT144	8.47011	0
METFORMIN_SORAFENIB_SW837	3.56551	0
METFORMIN_SORAFENIB_NCIH2122	7.18598	0
METFORMIN_SORAFENIB_OV90	8.27952	0
METFORMIN_SORAFENIB_NCIH23	7.38673	0
METFORMIN_SORAFENIB_HCT116	9.91526	0
METFORMIN_BEZ-235_LNCAP	72.7405	0
METFORMIN_BEZ-235_A375	14.381	0
METFORMIN_BEZ-235_DLD1	8.62975	0
METFORMIN_BEZ-235_NCIH1650	8.94087	0
METFORMIN_BEZ-235_SKOV3	9.16438	0
METFORMIN_BEZ-235_RKO	-0.105193	0
METFORMIN_BEZ-235_A2780	19.9166	0
METFORMIN_BEZ-235_EFM192B	25.58	0
METFORMIN_BEZ-235_SKMEL30	24.1983	0
METFORMIN_BEZ-235_HT29	16.256	0
METFORMIN_BEZ-235_NCIH520	18.6929	0
METFORMIN_BEZ-235_T47D	111.959	0
METFORMIN_BEZ-235_SW620	15.4374	0
METFORMIN_BEZ-235_SKMES1	21.6085	0
METFORMIN_BEZ-235_ES2	11.5337	0
METFORMIN_BEZ-235_MDAMB436	13.9843	0
METFORMIN_BEZ-235_LOVO	14.7945	0
METFORMIN_BEZ-235_MSTO	-0.166197	0
METFORMIN_BEZ-235_OVCAR3	18.6925	0
METFORMIN_BEZ-235_OV90	19.2586	0
METFORMIN_BEZ-235_COLO320DM	9.42896	0
METFORMIN_BEZ-235_UWB1289BRCA1	26.5547	0
METFORMIN_BEZ-235_HCT116	9.38763	0
METFORMIN_BEZ-235_CAOV3	36.4249	0
METFORMIN_BEZ-235_UWB1289	36.4379	0
METFORMIN_PD325901_LNCAP	23.9533	0
METFORMIN_PD325901_VCAP	-11.2706	0
METFORMIN_PD325901_OCUBM	-19.0539	0
METFORMIN_PD325901_A2058	26.4095	0
METFORMIN_PD325901_RKO	-11.427	0
METFORMIN_PD325901_A2780	-5.09294	0
METFORMIN_PD325901_SKMEL30	1.5936	0
METFORMIN_PD325901_PA1	9.8283	0
METFORMIN_PD325901_T47D	2.56963	0
METFORMIN_PD325901_UACC62	-8.75362	0
METFORMIN_PD325901_SKMES1	-4.71639	0
METFORMIN_PD325901_ES2	-7.09624	0
METFORMIN_PD325901_RPMI7951	-9.78039	0
METFORMIN_PD325901_MSTO	-1.71922	0
METFORMIN_PD325901_OVCAR3	16.0442	0
METFORMIN_PD325901_ZR751	-17.7939	0
METFORMIN_PD325901_HT144	-3.8109	0
METFORMIN_PD325901_NCIH2122	-1.92999	0
METFORMIN_PD325901_OV90	-9.62381	0
METFORMIN_PD325901_COLO320DM	-2.55922	0
METFORMIN_PD325901_NCIH23	-12.9124	0
METFORMIN_PD325901_UWB1289BRCA1	-0.210014	0
METFORMIN_PD325901_UWB1289	13.9334	0
METFORMIN_DASATINIB_LNCAP	7.10928	0
METFORMIN_DASATINIB_KPL1	7.52478	0
METFORMIN_DASATINIB_A375	-5.26089	0
METFORMIN_DASATINIB_NCIH1650	19.5426	0
METFORMIN_DASATINIB_SKOV3	-7.65205	0
METFORMIN_DASATINIB_A2058	17.0315	0
METFORMIN_DASATINIB_RKO	7.50115	0
METFORMIN_DASATINIB_A427	25.8835	0
METFORMIN_DASATINIB_A2780	26.019	0
METFORMIN_DASATINIB_EFM192B	29.3865	0
METFORMIN_DASATINIB_SKMEL30	-24.7259	0
METFORMIN_DASATINIB_NCIH520	23.6336	0
METFORMIN_DASATINIB_PA1	6.66924	0
METFORMIN_DASATINIB_T47D	13.132	0
METFORMIN_DASATINIB_UACC62	-0.704147	0
METFORMIN_DASATINIB_SW620	9.52379	0
METFORMIN_DASATINIB_SKMES1	-1.16067	0
METFORMIN_DASATINIB_ES2	-8.0477	0
METFORMIN_DASATINIB_MDAMB436	20.7036	0
METFORMIN_DASATINIB_RPMI7951	5.26833	0
METFORMIN_DASATINIB_MSTO	98.8038	0
METFORMIN_DASATINIB_OVCAR3	48.8798	0
METFORMIN_DASATINIB_ZR751	-11.3491	0
METFORMIN_DASATINIB_SW837	11.4169	0
METFORMIN_DASATINIB_COLO320DM	4.72562	0
METFORMIN_DASATINIB_NCIH23	-7.93397	0
METFORMIN_DASATINIB_HCT116	-31.9107	0
METFORMIN_DASATINIB_NCIH460	2.94927	0
METFORMIN_DASATINIB_CAOV3	-0.673258	0
METFORMIN_DASATINIB_UWB1289	2.18867	0
METFORMIN_AZD1775_LNCAP	3.08912	0
METFORMIN_AZD1775_KPL1	2.34142	0
METFORMIN_AZD1775_NCIH1650	9.3321	0
METFORMIN_AZD1775_SKOV3	12.5371	0
METFORMIN_AZD1775_VCAP	3.54525	0
METFORMIN_AZD1775_OCUBM	3.17509	0
METFORMIN_AZD1775_A2058	8.48862	0
METFORMIN_AZD1775_A427	4.87822	0
METFORMIN_AZD1775_A2780	9.36069	0
METFORMIN_AZD1775_SKMEL30	7.26652	0
METFORMIN_AZD1775_HT29	6.2176	0
METFORMIN_AZD1775_T47D	4.12091	0
METFORMIN_AZD1775_UACC62	10.8595	0
METFORMIN_AZD1775_SKMES1	6.28158	0
METFORMIN_AZD1775_ES2	3.22028	0
METFORMIN_AZD1775_MDAMB436	9.41243	0
METFORMIN_AZD1775_RPMI7951	15.8306	0
METFORMIN_AZD1775_LOVO	-0.805493	0
METFORMIN_AZD1775_MSTO	5.43169	0
METFORMIN_AZD1775_OVCAR3	9.98277	0
METFORMIN_AZD1775_ZR751	-17.075	0
METFORMIN_AZD1775_HT144	6.63878	0
METFORMIN_AZD1775_SW837	0.977671	0
METFORMIN_AZD1775_OV90	2.43309	0
METFORMIN_AZD1775_NCIH23	3.863	0
METFORMIN_AZD1775_UWB1289BRCA1	-0.612266	0
METFORMIN_AZD1775_HCT116	1.71171	0
METFORMIN_AZD1775_CAOV3	-3.3546	0
METFORMIN_AZD1775_UWB1289	72.2324	0
METFORMIN_MRK-003_LNCAP	-0.602925	0
METFORMIN_MRK-003_KPL1	5.48807	0
METFORMIN_MRK-003_SKOV3	16.1494	0
METFORMIN_MRK-003_VCAP	6.16091	0
METFORMIN_MRK-003_OCUBM	11.5399	0
METFORMIN_MRK-003_A2058	9.71177	0
METFORMIN_MRK-003_RKO	14.3637	0
METFORMIN_MRK-003_A427	10.2886	0
METFORMIN_MRK-003_EFM192B	8.21268	0
METFORMIN_MRK-003_PA1	15.9458	0
METFORMIN_MRK-003_UACC62	4.79327	0
METFORMIN_MRK-003_SW620	4.58537	0
METFORMIN_MRK-003_ES2	-2.65112	0
METFORMIN_MRK-003_MDAMB436	6.47585	0
METFORMIN_MRK-003_LOVO	2.46976	0
METFORMIN_MRK-003_MSTO	1.29435	0
METFORMIN_MRK-003_OVCAR3	17.5544	0
METFORMIN_MRK-003_HT144	10.7797	0
METFORMIN_MRK-003_SW837	3.6909	0
METFORMIN_MRK-003_NCIH2122	3.33455	0
METFORMIN_MRK-003_OV90	5.77408	0
METFORMIN_MRK-003_NCIH23	7.33902	0
METFORMIN_MRK-003_UWB1289BRCA1	-1.80466	0
METFORMIN_MRK-003_NCIH460	1.1619	0
METFORMIN_MRK-003_CAOV3	7.0606	0
METFORMIN_GELDANAMYCIN_KPL1	-12.1236	0
METFORMIN_GELDANAMYCIN_A375	-3.00241	0
METFORMIN_GELDANAMYCIN_NCIH1650	-8.87642	0
METFORMIN_GELDANAMYCIN_A2058	3.12679	0
METFORMIN_GELDANAMYCIN_A2780	-11.4849	0
METFORMIN_GELDANAMYCIN_EFM192B	-6.71876	0
METFORMIN_GELDANAMYCIN_SKMEL30	-4.32491	0
METFORMIN_GELDANAMYCIN_T47D	-8.03392	0
METFORMIN_GELDANAMYCIN_UACC62	-12.0932	0
METFORMIN_GELDANAMYCIN_ES2	-14.9192	0
METFORMIN_GELDANAMYCIN_RPMI7951	-18.3354	0
METFORMIN_GELDANAMYCIN_OVCAR3	-10.0302	0
METFORMIN_GELDANAMYCIN_ZR751	-19.4275	0
METFORMIN_GELDANAMYCIN_HT144	-13.9399	0
METFORMIN_GELDANAMYCIN_SW837	-13.0087	0
METFORMIN_GELDANAMYCIN_NCIH2122	-11.3439	0
METFORMIN_GELDANAMYCIN_NCIH23	-14.943	0
METFORMIN_GELDANAMYCIN_UWB1289BRCA1	-5.26328	0
METFORMIN_GELDANAMYCIN_HCT116	-0.566734	0
METFORMIN_GELDANAMYCIN_NCIH460	-5.12472	0
METFORMIN_GELDANAMYCIN_CAOV3	-13.8993	0
METFORMIN_LAPATINIB_LNCAP	18.2483	0
METFORMIN_LAPATINIB_KPL1	0.623825	0
METFORMIN_LAPATINIB_A375	-5.62922	0
METFORMIN_LAPATINIB_VCAP	-4.99349	0
METFORMIN_LAPATINIB_OCUBM	-1.57639	0
METFORMIN_LAPATINIB_A2058	10.7433	0
METFORMIN_LAPATINIB_RKO	-3.25865	0
METFORMIN_LAPATINIB_A427	-13.5741	0
METFORMIN_LAPATINIB_HT29	0.48733	0
METFORMIN_LAPATINIB_NCIH520	-7.1108	0
METFORMIN_LAPATINIB_T47D	19.0565	0
METFORMIN_LAPATINIB_UACC62	6.51334	0
METFORMIN_LAPATINIB_ES2	-8.4444	0
METFORMIN_LAPATINIB_RPMI7951	4.7479	0
METFORMIN_LAPATINIB_OVCAR3	11.1877	0
METFORMIN_LAPATINIB_HT144	-2.1273	0
METFORMIN_LAPATINIB_SW837	15.4489	0
METFORMIN_LAPATINIB_NCIH2122	2.38109	0
METFORMIN_LAPATINIB_OV90	-13.8972	0
METFORMIN_LAPATINIB_COLO320DM	7.02733	0
METFORMIN_LAPATINIB_NCIH23	-8.83442	0
METFORMIN_LAPATINIB_UWB1289BRCA1	11.8231	0
METFORMIN_LAPATINIB_HCT116	5.30641	0
METFORMIN_LAPATINIB_NCIH460	-7.01843	0
METFORMIN_LAPATINIB_UWB1289	9.55438	0
METFORMIN_MK-8669_LNCAP	14.4308	0
METFORMIN_MK-8669_A375	10.0388	0
METFORMIN_MK-8669_NCIH1650	12.3059	0
METFORMIN_MK-8669_SKOV3	18.8351	0
METFORMIN_MK-8669_A2058	26.6315	0
METFORMIN_MK-8669_RKO	17.2436	0
METFORMIN_MK-8669_A427	10.9247	0
METFORMIN_MK-8669_A2780	7.90368	0
METFORMIN_MK-8669_EFM192B	46.2564	0
METFORMIN_MK-8669_SKMEL30	21.2484	0
METFORMIN_MK-8669_NCIH520	3.50272	0
METFORMIN_MK-8669_PA1	-1.83515	0
METFORMIN_MK-8669_T47D	54.1268	0
METFORMIN_MK-8669_SW620	8.19245	0
METFORMIN_MK-8669_LOVO	18.3802	0
METFORMIN_MK-8669_MSTO	-2.56036	0
METFORMIN_MK-8669_OVCAR3	11.3323	0
METFORMIN_MK-8669_ZR751	17.0511	0
METFORMIN_MK-8669_SW837	-1.79059	0
METFORMIN_MK-8669_NCIH2122	3.214	0
METFORMIN_MK-8669_OV90	14.0897	0
METFORMIN_MK-8669_COLO320DM	7.13078	0
METFORMIN_MK-8669_UWB1289BRCA1	-1.39587	0
METFORMIN_MK-8669_NCIH460	2.42456	0
METFORMIN_MK-8669_CAOV3	1.89579	0
METFORMIN_MK-8669_UWB1289	14.1011	0
5-FU_TEMOZOLOMIDE_LNCAP	-16.1461	0
5-FU_TEMOZOLOMIDE_KPL1	-32.0355	0
5-FU_TEMOZOLOMIDE_A375	-15.9833	0
5-FU_TEMOZOLOMIDE_DLD1	-4.75342	0
5-FU_TEMOZOLOMIDE_NCIH1650	-16.1361	0
5-FU_TEMOZOLOMIDE_SKOV3	-4.02149	0
5-FU_TEMOZOLOMIDE_VCAP	-2.72952	0
5-FU_TEMOZOLOMIDE_OCUBM	-15.1214	0
5-FU_TEMOZOLOMIDE_A427	18.361	0
5-FU_TEMOZOLOMIDE_A2780	-0.604353	0
5-FU_TEMOZOLOMIDE_EFM192B	-39.7172	0
5-FU_TEMOZOLOMIDE_PA1	5.88593	0
5-FU_TEMOZOLOMIDE_UACC62	-11.9686	0
5-FU_TEMOZOLOMIDE_SKMES1	5.04754	0
5-FU_TEMOZOLOMIDE_ES2	3.42561	0
5-FU_TEMOZOLOMIDE_MDAMB436	7.54653	0
5-FU_TEMOZOLOMIDE_MSTO	-8.45232	0
5-FU_TEMOZOLOMIDE_OVCAR3	4.25326	0
5-FU_TEMOZOLOMIDE_ZR751	-51.9886	0
5-FU_TEMOZOLOMIDE_HT144	-24.2865	0
5-FU_TEMOZOLOMIDE_SW837	-44.6179	0
5-FU_TEMOZOLOMIDE_NCIH2122	-4.97643	0
5-FU_TEMOZOLOMIDE_CAOV3	-35.6606	0
5-FU_TEMOZOLOMIDE_UWB1289	17.2143	0
5-FU_ABT-888_KPL1	2.157	0
5-FU_ABT-888_A375	-1.19851	0
5-FU_ABT-888_SKOV3	5.07718	0
5-FU_ABT-888_VCAP	1.0961	0
5-FU_ABT-888_OCUBM	3.93215	0
5-FU_ABT-888_A2058	7.69353	0
5-FU_ABT-888_RKO	-2.67759	0
5-FU_ABT-888_A427	2.59568	0
5-FU_ABT-888_EFM192B	-5.08985	0
5-FU_ABT-888_NCIH520	3.69883	0
5-FU_ABT-888_T47D	17.4858	0
5-FU_ABT-888_SW620	0.108108	0
5-FU_ABT-888_SKMES1	-0.0864246	0
5-FU_ABT-888_ES2	1.49865	0
5-FU_ABT-888_MDAMB436	6.89926	0
5-FU_ABT-888_RPMI7951	-2.17322	0
5-FU_ABT-888_LOVO	-8.97921	0
5-FU_ABT-888_MSTO	-1.79307	0
5-FU_ABT-888_OVCAR3	17.637	0
5-FU_ABT-888_ZR751	-8.67532	0
5-FU_ABT-888_SW837	-14.5231	0
5-FU_ABT-888_NCIH2122	7.89026	0
5-FU_ABT-888_COLO320DM	4.17594	0
5-FU_ABT-888_UWB1289BRCA1	6.57726	0
5-FU_ABT-888_HCT116	9.46328	0
5-FU_ABT-888_CAOV3	-5.13997	0
5-FU_ZOLINZA_LNCAP	7.74888	0
5-FU_ZOLINZA_A375	0.369467	0
5-FU_ZOLINZA_DLD1	0.0498057	0
5-FU_ZOLINZA_VCAP	22.9957	0
5-FU_ZOLINZA_RKO	11.0483	0
5-FU_ZOLINZA_A427	-31.9469	0
5-FU_ZOLINZA_A2780	-3.8484	0
5-FU_ZOLINZA_EFM192B	0.248694	0
5-FU_ZOLINZA_SKMEL30	-4.8804	0
5-FU_ZOLINZA_HT29	-1.42768	0
5-FU_ZOLINZA_PA1	-2.24688	0
5-FU_ZOLINZA_T47D	7.53001	0
5-FU_ZOLINZA_UACC62	3.93242	0
5-FU_ZOLINZA_MDAMB436	4.86044	0
5-FU_ZOLINZA_RPMI7951	-0.240638	0
5-FU_ZOLINZA_LOVO	-8.39805	0
5-FU_ZOLINZA_OVCAR3	3.61789	0
5-FU_ZOLINZA_ZR751	-20.6775	0
5-FU_ZOLINZA_HT144	-4.39473	0
5-FU_ZOLINZA_SW837	-3.53216	0
5-FU_ZOLINZA_NCIH2122	10.6563	0
5-FU_ZOLINZA_COLO320DM	5.37545	0
5-FU_ZOLINZA_UWB1289BRCA1	7.83129	0
5-FU_ZOLINZA_NCIH460	7.05722	0
5-FU_ZOLINZA_UWB1289	-0.548894	0
5-FU_MK-4827_LNCAP	-24.4815	0
5-FU_MK-4827_KPL1	-3.724	0
5-FU_MK-4827_A375	-2.19136	0
5-FU_MK-4827_DLD1	0.81374	0
5-FU_MK-4827_NCIH1650	-9.24802	0
5-FU_MK-4827_VCAP	10.9886	0
5-FU_MK-4827_OCUBM	10.3366	0
5-FU_MK-4827_RKO	-0.32187	0
5-FU_MK-4827_A2780	9.92009	0
5-FU_MK-4827_SKMEL30	3.76696	0
5-FU_MK-4827_HT29	3.28032	0
5-FU_MK-4827_UACC62	1.33186	0
5-FU_MK-4827_SKMES1	0.730438	0
5-FU_MK-4827_MDAMB436	2.56506	0
5-FU_MK-4827_MSTO	-54.8482	0
5-FU_MK-4827_OVCAR3	-1.83764	0
5-FU_MK-4827_HT144	-2.57271	0
5-FU_MK-4827_SW837	-12.7245	0
5-FU_MK-4827_NCIH23	-10.5263	0
5-FU_MK-4827_HCT116	8.0324	0
5-FU_MK-4827_CAOV3	-3.74601	0
5-FU_MK-4827_UWB1289	0.788089	0
5-FU_MK-8776_KPL1	-1.20877	0
5-FU_MK-8776_A375	22.0973	0
5-FU_MK-8776_DLD1	6.4083	0
5-FU_MK-8776_NCIH1650	14.0409	0
5-FU_MK-8776_SKOV3	5.55966	0
5-FU_MK-8776_OCUBM	58.8496	0
5-FU_MK-8776_A2058	23.5227	0
5-FU_MK-8776_A427	37.9268	0
5-FU_MK-8776_SKMEL30	-81.4413	0
5-FU_MK-8776_NCIH520	18.3059	0
5-FU_MK-8776_PA1	8.86948	0
5-FU_MK-8776_T47D	2.4582	0
5-FU_MK-8776_SW620	7.24851	0
5-FU_MK-8776_MDAMB436	43.3549	0
5-FU_MK-8776_RPMI7951	4.92362	0
5-FU_MK-8776_LOVO	3.62927	0
5-FU_MK-8776_OVCAR3	10.1051	0
5-FU_MK-8776_ZR751	-0.408307	0
5-FU_MK-8776_HT144	3.37073	0
5-FU_MK-8776_SW837	-20.5266	0
5-FU_MK-8776_NCIH2122	12.6385	0
5-FU_MK-8776_COLO320DM	7.62587	0
5-FU_MK-8776_NCIH23	1.45608	0
5-FU_MK-8776_UWB1289BRCA1	-11.1516	0
5-FU_MK-8776_CAOV3	57.1036	0
5-FU_BORTEZOMIB_LNCAP	-1.85523	0
5-FU_BORTEZOMIB_KPL1	-2.99753	0
5-FU_BORTEZOMIB_NCIH1650	-15.7787	0
5-FU_BORTEZOMIB_SKOV3	-4.60489	0
5-FU_BORTEZOMIB_OCUBM	-7.50862	0
5-FU_BORTEZOMIB_A427	-7.87671	0
5-FU_BORTEZOMIB_A2780	-18.5991	0
5-FU_BORTEZOMIB_EFM192B	-8.35611	0
5-FU_BORTEZOMIB_SKMEL30	-172.889	0
5-FU_BORTEZOMIB_HT29	-15.9516	0
5-FU_BORTEZOMIB_NCIH520	-24.0676	0
5-FU_BORTEZOMIB_PA1	-20.7062	0
5-FU_BORTEZOMIB_T47D	2.74879	0
5-FU_BORTEZOMIB_SW620	-1.90797	0
5-FU_BORTEZOMIB_SKMES1	-11.6427	0
5-FU_BORTEZOMIB_LOVO	-6.17598	0
5-FU_BORTEZOMIB_MSTO	52.4852	0
5-FU_BORTEZOMIB_OVCAR3	-9.89504	0
5-FU_BORTEZOMIB_SW837	-1.36186	0
5-FU_BORTEZOMIB_COLO320DM	-10.9704	0
5-FU_BORTEZOMIB_NCIH23	-9.19096	0
5-FU_BORTEZOMIB_UWB1289	-15.0308	0
5-FU_ERLOTINIB_KPL1	-3.01527	0
5-FU_ERLOTINIB_A375	13.9644	0
5-FU_ERLOTINIB_DLD1	10.1813	0
5-FU_ERLOTINIB_VCAP	24.4138	0
5-FU_ERLOTINIB_OCUBM	28.1444	0
5-FU_ERLOTINIB_A2058	9.69429	0
5-FU_ERLOTINIB_RKO	20.9876	0
5-FU_ERLOTINIB_A427	18.4293	0
5-FU_ERLOTINIB_A2780	16.5693	0
5-FU_ERLOTINIB_SKMEL30	13.9549	0
5-FU_ERLOTINIB_HT29	11.3375	0
5-FU_ERLOTINIB_UACC62	17.969	0
5-FU_ERLOTINIB_SW620	0.49489	0
5-FU_ERLOTINIB_SKMES1	21.2894	0
5-FU_ERLOTINIB_ES2	15.1232	0
5-FU_ERLOTINIB_MDAMB436	16.1499	0
5-FU_ERLOTINIB_RPMI7951	17.0048	0
5-FU_ERLOTINIB_MSTO	-45.8938	0
5-FU_ERLOTINIB_ZR751	22.8306	0
5-FU_ERLOTINIB_HT144	9.55945	0
5-FU_ERLOTINIB_OV90	-11.04	0
5-FU_ERLOTINIB_NCIH23	6.37341	0
5-FU_ERLOTINIB_HCT116	14.453	0
5-FU_ERLOTINIB_NCIH460	17.2248	0
5-FU_ERLOTINIB_CAOV3	-7.95164	0
5-FU_ERLOTINIB_UWB1289	16.4444	0
5-FU_DINACICLIB_LNCAP	-0.848044	0
5-FU_DINACICLIB_KPL1	0.00735546	0
5-FU_DINACICLIB_SKOV3	-13.8991	0
5-FU_DINACICLIB_A2058	4.3317	0
5-FU_DINACICLIB_RKO	5.62382	0
5-FU_DINACICLIB_A427	-7.74747	0
5-FU_DINACICLIB_A2780	-8.16113	0
5-FU_DINACICLIB_EFM192B	0.312107	0
5-FU_DINACICLIB_SKMEL30	-96.6171	0
5-FU_DINACICLIB_NCIH520	-4.32105	0
5-FU_DINACICLIB_PA1	-5.73287	0
5-FU_DINACICLIB_T47D	-2.72199	0
5-FU_DINACICLIB_UACC62	3.68257	0
5-FU_DINACICLIB_SKMES1	-3.14034	0
5-FU_DINACICLIB_MDAMB436	5.34753	0
5-FU_DINACICLIB_LOVO	-11.877	0
5-FU_DINACICLIB_MSTO	1.11043	0
5-FU_DINACICLIB_OVCAR3	2.70647	0
5-FU_DINACICLIB_ZR751	-13.5824	0
5-FU_DINACICLIB_HT144	-3.47742	0
5-FU_DINACICLIB_NCIH2122	1.21871	0
5-FU_DINACICLIB_OV90	-5.93558	0
5-FU_DINACICLIB_COLO320DM	4.80755	0
5-FU_DINACICLIB_NCIH23	-9.5337	0
5-FU_DINACICLIB_NCIH460	-7.42098	0
5-FU_DINACICLIB_UWB1289	-0.233191	0
5-FU_SUNITINIB_LNCAP	-6.20084	0
5-FU_SUNITINIB_KPL1	7.22949	0
5-FU_SUNITINIB_A375	7.35105	0
5-FU_SUNITINIB_DLD1	10.9053	0
5-FU_SUNITINIB_SKOV3	18.2644	0
5-FU_SUNITINIB_VCAP	12.4838	0
5-FU_SUNITINIB_OCUBM	8.99847	0
5-FU_SUNITINIB_A2058	9.62162	0
5-FU_SUNITINIB_RKO	7.99636	0
5-FU_SUNITINIB_A2780	9.70099	0
5-FU_SUNITINIB_EFM192B	-3.19594	0
5-FU_SUNITINIB_HT29	3.37905	0
5-FU_SUNITINIB_PA1	12.4563	0
5-FU_SUNITINIB_UACC62	8.79569	0
5-FU_SUNITINIB_SW620	6.8595	0
5-FU_SUNITINIB_SKMES1	11.9026	0
5-FU_SUNITINIB_ES2	14.4138	0
5-FU_SUNITINIB_RPMI7951	-1.34326	0
5-FU_SUNITINIB_LOVO	2.08231	0
5-FU_SUNITINIB_OVCAR3	7.23648	0
5-FU_SUNITINIB_SW837	-4.90184	0
5-FU_SUNITINIB_NCIH2122	5.83863	0
5-FU_SUNITINIB_OV90	3.66436	0
5-FU_SUNITINIB_COLO320DM	14.823	0
5-FU_SUNITINIB_NCIH23	3.14167	0
5-FU_SUNITINIB_UWB1289BRCA1	11.7911	0
5-FU_SUNITINIB_HCT116	7.33278	0
5-FU_SUNITINIB_CAOV3	5.09214	0
5-FU_L778123_LNCAP	5.03865	0
5-FU_L778123_KPL1	2.49673	0
5-FU_L778123_A375	7.63294	0
5-FU_L778123_NCIH1650	12.2198	0
5-FU_L778123_VCAP	12.7404	0
5-FU_L778123_RKO	4.77866	0
5-FU_L778123_A427	12.3277	0
5-FU_L778123_EFM192B	5.15988	0
5-FU_L778123_SKMEL30	-57.8845	0
5-FU_L778123_NCIH520	13.7782	0
5-FU_L778123_PA1	14.5367	0
5-FU_L778123_UACC62	6.81792	0
5-FU_L778123_SW620	4.8158	0
5-FU_L778123_SKMES1	6.079	0
5-FU_L778123_MDAMB436	6.60491	0
5-FU_L778123_RPMI7951	0.773044	0
5-FU_L778123_LOVO	3.09507	0
5-FU_L778123_MSTO	1.03448	0
5-FU_L778123_OVCAR3	3.60258	0
5-FU_L778123_ZR751	8.12049	0
5-FU_L778123_NCIH2122	1.49192	0
5-FU_L778123_OV90	12.2053	0
5-FU_L778123_UWB1289BRCA1	12.5476	0
5-FU_L778123_HCT116	11.7124	0
5-FU_MK-2206_LNCAP	8.30599	0
5-FU_MK-2206_A375	1.46275	0
5-FU_MK-2206_SKOV3	12.7259	0
5-FU_MK-2206_VCAP	8.88284	0
5-FU_MK-2206_OCUBM	0.751552	0
5-FU_MK-2206_A427	14.1171	0
5-FU_MK-2206_EFM192B	-2.2255	0
5-FU_MK-2206_HT29	15.7045	0
5-FU_MK-2206_NCIH520	12.9539	0
5-FU_MK-2206_PA1	22.8439	0
5-FU_MK-2206_T47D	5.96861	0
5-FU_MK-2206_UACC62	16.6719	0
5-FU_MK-2206_SW620	12.5555	0
5-FU_MK-2206_MDAMB436	11.6054	0
5-FU_MK-2206_RPMI7951	13.7925	0
5-FU_MK-2206_OVCAR3	16.3679	0
5-FU_MK-2206_ZR751	11.5602	0
5-FU_MK-2206_HT144	2.02143	0
5-FU_MK-2206_SW837	5.17233	0
5-FU_MK-2206_NCIH2122	14.5182	0
5-FU_MK-2206_NCIH23	3.9299	0
5-FU_MK-2206_HCT116	4.12342	0
5-FU_MK-2206_NCIH460	16.5836	0
5-FU_MK-4541_LNCAP	2.95593	0
5-FU_MK-4541_KPL1	-5.64816	0
5-FU_MK-4541_A375	2.07535	0
5-FU_MK-4541_DLD1	3.65312	0
5-FU_MK-4541_NCIH1650	-1.11298	0
5-FU_MK-4541_SKOV3	-5.47332	0
5-FU_MK-4541_VCAP	21.2146	0
5-FU_MK-4541_A2058	2.48286	0
5-FU_MK-4541_RKO	2.24631	0
5-FU_MK-4541_A2780	3.61664	0
5-FU_MK-4541_EFM192B	-7.71889	0
5-FU_MK-4541_SKMEL30	13.8151	0
5-FU_MK-4541_HT29	6.91792	0
5-FU_MK-4541_PA1	7.47839	0
5-FU_MK-4541_T47D	0.819542	0
5-FU_MK-4541_UACC62	1.02958	0
5-FU_MK-4541_SW620	-2.4718	0
5-FU_MK-4541_SKMES1	-7.63406	0
5-FU_MK-4541_ES2	9.05175	0
5-FU_MK-4541_MDAMB436	6.27982	0
5-FU_MK-4541_RPMI7951	-1.77186	0
5-FU_MK-4541_OVCAR3	-5.69279	0
5-FU_MK-4541_SW837	-9.5883	0
5-FU_MK-4541_NCIH2122	7.61104	0
5-FU_MK-4541_OV90	-8.99727	0
5-FU_MK-4541_COLO320DM	8.71131	0
5-FU_MK-4541_HCT116	3.51714	0
5-FU_MK-4541_NCIH460	-0.891262	0
5-FU_MK-4541_CAOV3	16.0969	0
5-FU_MK-4541_UWB1289	-0.418224	0
5-FU_MK-5108_A375	8.99844	0
5-FU_MK-5108_NCIH1650	-0.659984	0
5-FU_MK-5108_SKOV3	8.18286	0
5-FU_MK-5108_VCAP	11.6497	0
5-FU_MK-5108_OCUBM	4.94212	0
5-FU_MK-5108_A2058	1.8049	0
5-FU_MK-5108_A427	3.53503	0
5-FU_MK-5108_A2780	9.26081	0
5-FU_MK-5108_SKMEL30	14.8386	0
5-FU_MK-5108_HT29	12.4305	0
5-FU_MK-5108_PA1	16.3248	0
5-FU_MK-5108_T47D	4.92942	0
5-FU_MK-5108_UACC62	8.18665	0
5-FU_MK-5108_SW620	4.19824	0
5-FU_MK-5108_ES2	3.51298	0
5-FU_MK-5108_MDAMB436	2.81721	0
5-FU_MK-5108_RPMI7951	4.42377	0
5-FU_MK-5108_LOVO	0.95696	0
5-FU_MK-5108_MSTO	-34.4459	0
5-FU_MK-5108_OVCAR3	10.0174	0
5-FU_MK-5108_HT144	0.796024	0
5-FU_MK-5108_SW837	-3.19471	0
5-FU_MK-5108_NCIH2122	-1.78864	0
5-FU_MK-5108_OV90	0.710257	0
5-FU_MK-5108_COLO320DM	12.5843	0
5-FU_MK-5108_UWB1289BRCA1	13.8818	0
5-FU_MK-5108_NCIH460	-5.65948	0
5-FU_SORAFENIB_LNCAP	-13.3903	0
5-FU_SORAFENIB_A375	1.31245	0
5-FU_SORAFENIB_DLD1	6.32051	0
5-FU_SORAFENIB_SKOV3	10.2363	0
5-FU_SORAFENIB_VCAP	1.44431	0
5-FU_SORAFENIB_OCUBM	1.31009	0
5-FU_SORAFENIB_A2058	1.48746	0
5-FU_SORAFENIB_RKO	1.88358	0
5-FU_SORAFENIB_A2780	2.07732	0
5-FU_SORAFENIB_EFM192B	-9.02215	0
5-FU_SORAFENIB_SKMEL30	2.12003	0
5-FU_SORAFENIB_PA1	4.95728	0
5-FU_SORAFENIB_T47D	-4.53138	0
5-FU_SORAFENIB_SKMES1	0.285154	0
5-FU_SORAFENIB_ES2	0.12668	0
5-FU_SORAFENIB_MDAMB436	-4.30432	0
5-FU_SORAFENIB_LOVO	-13.8153	0
5-FU_SORAFENIB_ZR751	-11.3618	0
5-FU_SORAFENIB_SW837	-8.60896	0
5-FU_SORAFENIB_NCIH2122	-3.76882	0
5-FU_SORAFENIB_OV90	2.41684	0
5-FU_SORAFENIB_NCIH23	-1.28681	0
5-FU_SORAFENIB_UWB1289BRCA1	3.50037	0
5-FU_SORAFENIB_NCIH460	-0.895638	0
5-FU_BEZ-235_KPL1	16.4628	0
5-FU_BEZ-235_A375	3.29055	0
5-FU_BEZ-235_DLD1	13.0356	0
5-FU_BEZ-235_A427	8.84281	0
5-FU_BEZ-235_A2780	3.93322	0
5-FU_BEZ-235_EFM192B	9.66032	0
5-FU_BEZ-235_SKMEL30	-73.1384	0
5-FU_BEZ-235_HT29	11.8958	0
5-FU_BEZ-235_PA1	21.5624	0
5-FU_BEZ-235_UACC62	7.93188	0
5-FU_BEZ-235_SW620	12.0286	0
5-FU_BEZ-235_SKMES1	21.2679	0
5-FU_BEZ-235_ES2	2.47743	0
5-FU_BEZ-235_MDAMB436	18.9743	0
5-FU_BEZ-235_RPMI7951	12.7059	0
5-FU_BEZ-235_LOVO	0.0497243	0
5-FU_BEZ-235_MSTO	-8.32112	0
5-FU_BEZ-235_OVCAR3	17.1196	0
5-FU_BEZ-235_HT144	2.32309	0
5-FU_BEZ-235_NCIH2122	7.69727	0
5-FU_BEZ-235_NCIH23	4.99022	0
5-FU_BEZ-235_UWB1289BRCA1	18.865	0
5-FU_BEZ-235_HCT116	2.74578	0
5-FU_BEZ-235_NCIH460	20.1004	0
5-FU_PD325901_LNCAP	1.64567	0
5-FU_PD325901_KPL1	-6.34503	0
5-FU_PD325901_DLD1	18.4586	0
5-FU_PD325901_NCIH1650	4.32537	0
5-FU_PD325901_SKOV3	2.85293	0
5-FU_PD325901_VCAP	11.435	0
5-FU_PD325901_OCUBM	16.9153	0
5-FU_PD325901_A427	16.5185	0
5-FU_PD325901_A2780	24.6101	0
5-FU_PD325901_EFM192B	-3.03489	0
5-FU_PD325901_SKMEL30	-144.402	0
5-FU_PD325901_NCIH520	-1.14292	0
5-FU_PD325901_PA1	8.06426	0
5-FU_PD325901_UACC62	-3.44323	0
5-FU_PD325901_SW620	2.34725	0
5-FU_PD325901_MDAMB436	9.35807	0
5-FU_PD325901_ZR751	-7.01847	0
5-FU_PD325901_SW837	0.946096	0
5-FU_PD325901_NCIH2122	3.09745	0
5-FU_PD325901_OV90	-6.56699	0
5-FU_PD325901_NCIH23	4.26271	0
5-FU_PD325901_NCIH460	16.3322	0
5-FU_PD325901_CAOV3	-1.1278	0
5-FU_DASATINIB_A375	2.68369	0
5-FU_DASATINIB_DLD1	21.4331	0
5-FU_DASATINIB_NCIH1650	23.235	0
5-FU_DASATINIB_VCAP	21.4557	0
5-FU_DASATINIB_A2058	31.1256	0
5-FU_DASATINIB_RKO	17.3116	0
5-FU_DASATINIB_A427	28.3481	0
5-FU_DASATINIB_A2780	50.6037	0
5-FU_DASATINIB_EFM192B	3.84238	0
5-FU_DASATINIB_SKMEL30	-4.61869	0
5-FU_DASATINIB_HT29	17.067	0
5-FU_DASATINIB_NCIH520	42.7351	0
5-FU_DASATINIB_ES2	17.6902	0
5-FU_DASATINIB_MDAMB436	18.7187	0
5-FU_DASATINIB_RPMI7951	19.0636	0
5-FU_DASATINIB_MSTO	17.563	0
5-FU_DASATINIB_OVCAR3	57.0331	0
5-FU_DASATINIB_HT144	-22.9733	0
5-FU_DASATINIB_OV90	0.433035	0
5-FU_DASATINIB_NCIH23	11.5591	0
5-FU_DASATINIB_HCT116	-7.81927	0
5-FU_DASATINIB_NCIH460	21.6687	0
5-FU_DASATINIB_CAOV3	17.8798	0
5-FU_DASATINIB_UWB1289	3.7659	0
5-FU_AZD1775_KPL1	-2.06116	0
5-FU_AZD1775_DLD1	9.82012	0
5-FU_AZD1775_NCIH1650	10.7734	0
5-FU_AZD1775_SKOV3	18.745	0
5-FU_AZD1775_OCUBM	33.5929	0
5-FU_AZD1775_RKO	19.3332	0
5-FU_AZD1775_A427	7.49406	0
5-FU_AZD1775_SKMEL30	2.28872	0
5-FU_AZD1775_NCIH520	2.57871	0
5-FU_AZD1775_PA1	25.0726	0
5-FU_AZD1775_T47D	10.0384	0
5-FU_AZD1775_UACC62	11.4594	0
5-FU_AZD1775_SW620	8.05167	0
5-FU_AZD1775_SKMES1	33.3533	0
5-FU_AZD1775_ES2	10.0575	0
5-FU_AZD1775_MDAMB436	23.3811	0
5-FU_AZD1775_RPMI7951	16.722	0
5-FU_AZD1775_MSTO	-32.9906	0
5-FU_AZD1775_OVCAR3	12.2337	0
5-FU_AZD1775_ZR751	0.423932	0
5-FU_AZD1775_HT144	6.06539	0
5-FU_AZD1775_SW837	2.57786	0
5-FU_AZD1775_OV90	-3.19365	0
5-FU_AZD1775_NCIH23	-7.1159	0
5-FU_AZD1775_HCT116	13.9613	0
5-FU_AZD1775_UWB1289	70.1582	0
5-FU_MRK-003_LNCAP	-8.42072	0
5-FU_MRK-003_VCAP	11.5075	0
5-FU_MRK-003_A2058	12.5716	0
5-FU_MRK-003_RKO	-0.901579	0
5-FU_MRK-003_A427	4.46644	0
5-FU_MRK-003_A2780	5.53297	0
5-FU_MRK-003_EFM192B	-8.73522	0
5-FU_MRK-003_SKMEL30	8.27345	0
5-FU_MRK-003_HT29	3.72005	0
5-FU_MRK-003_NCIH520	-0.789851	0
5-FU_MRK-003_T47D	-10.8474	0
5-FU_MRK-003_UACC62	12.4813	0
5-FU_MRK-003_SW620	0.985785	0
5-FU_MRK-003_SKMES1	2.64491	0
5-FU_MRK-003_MDAMB436	4.40304	0
5-FU_MRK-003_RPMI7951	8.45147	0
5-FU_MRK-003_LOVO	-0.374345	0
5-FU_MRK-003_MSTO	-46.9361	0
5-FU_MRK-003_ZR751	-7.16868	0
5-FU_MRK-003_HT144	8.94804	0
5-FU_MRK-003_SW837	1.08499	0
5-FU_MRK-003_NCIH2122	-11.3017	0
5-FU_MRK-003_NCIH23	1.91705	0
5-FU_MRK-003_HCT116	-0.654262	0
5-FU_MRK-003_NCIH460	-8.29671	0
5-FU_MRK-003_CAOV3	9.75067	0
5-FU_MRK-003_UWB1289	-10.5858	0
5-FU_GELDANAMYCIN_LNCAP	16.3096	0
5-FU_GELDANAMYCIN_A375	7.16098	0
5-FU_GELDANAMYCIN_DLD1	2.4339	0
5-FU_GELDANAMYCIN_SKOV3	-9.18816	0
5-FU_GELDANAMYCIN_VCAP	14.0445	0
5-FU_GELDANAMYCIN_OCUBM	-0.938925	0
5-FU_GELDANAMYCIN_RKO	5.24618	0
5-FU_GELDANAMYCIN_A2780	0.911964	0
5-FU_GELDANAMYCIN_NCIH520	3.51304	0
5-FU_GELDANAMYCIN_PA1	-1.79461	0
5-FU_GELDANAMYCIN_T47D	30.68	0
5-FU_GELDANAMYCIN_UACC62	-1.3454	0
5-FU_GELDANAMYCIN_SW620	-2.85127	0
5-FU_GELDANAMYCIN_SKMES1	2.70361	0
5-FU_GELDANAMYCIN_ES2	-5.25702	0
5-FU_GELDANAMYCIN_MDAMB436	5.79911	0
5-FU_GELDANAMYCIN_RPMI7951	-8.08425	0
5-FU_GELDANAMYCIN_LOVO	-6.35314	0
5-FU_GELDANAMYCIN_MSTO	1.45922	0
5-FU_GELDANAMYCIN_HT144	5.37222	0
5-FU_GELDANAMYCIN_SW837	-10.0142	0
5-FU_GELDANAMYCIN_NCIH2122	-2.69273	0
5-FU_GELDANAMYCIN_OV90	0.284509	0
5-FU_GELDANAMYCIN_COLO320DM	7.23188	0
5-FU_GELDANAMYCIN_NCIH23	-9.33481	0
5-FU_GELDANAMYCIN_UWB1289BRCA1	-7.74706	0
5-FU_GELDANAMYCIN_HCT116	2.91666	0
5-FU_GELDANAMYCIN_NCIH460	-2.4468	0
5-FU_GELDANAMYCIN_UWB1289	-6.75298	0
5-FU_LAPATINIB_LNCAP	-16.3765	0
5-FU_LAPATINIB_NCIH1650	0.905817	0
5-FU_LAPATINIB_SKOV3	7.11878	0
5-FU_LAPATINIB_VCAP	10.6326	0
5-FU_LAPATINIB_RKO	11.5445	0
5-FU_LAPATINIB_A427	-4.17945	0
5-FU_LAPATINIB_EFM192B	7.23819	0
5-FU_LAPATINIB_HT29	4.53309	0
5-FU_LAPATINIB_NCIH520	-7.26352	0
5-FU_LAPATINIB_T47D	14.9093	0
5-FU_LAPATINIB_UACC62	9.11995	0
5-FU_LAPATINIB_SKMES1	11.0596	0
5-FU_LAPATINIB_MDAMB436	3.64464	0
5-FU_LAPATINIB_LOVO	17.4906	0
5-FU_LAPATINIB_OVCAR3	18.0119	0
5-FU_LAPATINIB_ZR751	14.6763	0
5-FU_LAPATINIB_HT144	4.67057	0
5-FU_LAPATINIB_SW837	6.95633	0
5-FU_LAPATINIB_OV90	-9.29507	0
5-FU_LAPATINIB_NCIH23	-8.7348	0
5-FU_LAPATINIB_UWB1289BRCA1	19.0059	0
5-FU_LAPATINIB_HCT116	9.68804	0
5-FU_MK-8669_LNCAP	15.9941	0
5-FU_MK-8669_KPL1	11.1882	0
5-FU_MK-8669_A375	12.7628	0
5-FU_MK-8669_DLD1	24.5518	0
5-FU_MK-8669_NCIH1650	15.8599	0
5-FU_MK-8669_SKOV3	28.7151	0
5-FU_MK-8669_VCAP	29.6719	0
5-FU_MK-8669_OCUBM	23.6583	0
5-FU_MK-8669_A2058	32.3362	0
5-FU_MK-8669_RKO	23.2541	0
5-FU_MK-8669_A427	20.6279	0
5-FU_MK-8669_EFM192B	20.5173	0
5-FU_MK-8669_SKMEL30	28.1921	0
5-FU_MK-8669_HT29	11.8106	0
5-FU_MK-8669_PA1	41.3012	0
5-FU_MK-8669_T47D	24.1786	0
5-FU_MK-8669_SW620	12.1374	0
5-FU_MK-8669_SKMES1	8.51691	0
5-FU_MK-8669_RPMI7951	27.3312	0
5-FU_MK-8669_MSTO	-34.4302	0
5-FU_MK-8669_OVCAR3	6.72564	0
5-FU_MK-8669_ZR751	10.325	0
5-FU_MK-8669_HT144	4.91574	0
5-FU_MK-8669_NCIH2122	10.3042	0
5-FU_MK-8669_OV90	9.56259	0
5-FU_MK-8669_COLO320DM	9.39806	0
5-FU_MK-8669_UWB1289BRCA1	28.395	0
5-FU_MK-8669_HCT116	2.54933	0
5-FU_MK-8669_CAOV3	8.76344	0
5-FU_MK-8669_UWB1289	25.238	0
TEMOZOLOMIDE_ABT-888_OCUBM	64.5057	0
TEMOZOLOMIDE_ABT-888_RKO	-17.7324	0
TEMOZOLOMIDE_ABT-888_A427	29.9478	0
TEMOZOLOMIDE_ABT-888_A2780	54.4182	0
TEMOZOLOMIDE_ABT-888_EFM192B	7.75755	0
TEMOZOLOMIDE_ABT-888_SKMEL30	20.6606	0
TEMOZOLOMIDE_ABT-888_HT29	5.96821	0
TEMOZOLOMIDE_ABT-888_NCIH520	18.9811	0
TEMOZOLOMIDE_ABT-888_T47D	1.87522	0
TEMOZOLOMIDE_ABT-888_UACC62	16.7793	0
TEMOZOLOMIDE_ABT-888_SW620	19.7797	0
TEMOZOLOMIDE_ABT-888_MDAMB436	42.311	0
TEMOZOLOMIDE_ABT-888_RPMI7951	10.4234	0
TEMOZOLOMIDE_ABT-888_LOVO	1.1154	0
TEMOZOLOMIDE_ABT-888_HT144	-1.51518	0
TEMOZOLOMIDE_ABT-888_SW837	-12.751	0
TEMOZOLOMIDE_ABT-888_OV90	5.56464	0
TEMOZOLOMIDE_ABT-888_COLO320DM	7.78106	0
TEMOZOLOMIDE_ABT-888_UWB1289BRCA1	20.0115	0
TEMOZOLOMIDE_ABT-888_HCT116	17.001	0
TEMOZOLOMIDE_ABT-888_CAOV3	24.4484	0
TEMOZOLOMIDE_ABT-888_UWB1289	29.5348	0
TEMOZOLOMIDE_CYCLOPHOSPHAMIDE_A375	12.0837	0
TEMOZOLOMIDE_CYCLOPHOSPHAMIDE_DLD1	-1.72024	0
TEMOZOLOMIDE_CYCLOPHOSPHAMIDE_NCIH1650	-27.4584	0
TEMOZOLOMIDE_CYCLOPHOSPHAMIDE_SKOV3	-8.11221	0
TEMOZOLOMIDE_CYCLOPHOSPHAMIDE_VCAP	-7.78909	0
TEMOZOLOMIDE_CYCLOPHOSPHAMIDE_A2058	18.0784	0
TEMOZOLOMIDE_CYCLOPHOSPHAMIDE_SKMEL30	10.1012	0
TEMOZOLOMIDE_CYCLOPHOSPHAMIDE_NCIH520	6.94463	0
TEMOZOLOMIDE_CYCLOPHOSPHAMIDE_PA1	9.39325	0
TEMOZOLOMIDE_CYCLOPHOSPHAMIDE_T47D	-47.7495	0
TEMOZOLOMIDE_CYCLOPHOSPHAMIDE_MDAMB436	-4.15745	0
TEMOZOLOMIDE_CYCLOPHOSPHAMIDE_MSTO	13.1028	0
TEMOZOLOMIDE_CYCLOPHOSPHAMIDE_ZR751	6.77912	0
TEMOZOLOMIDE_CYCLOPHOSPHAMIDE_HT144	0.527579	0
TEMOZOLOMIDE_CYCLOPHOSPHAMIDE_SW837	-37.7704	0
TEMOZOLOMIDE_CYCLOPHOSPHAMIDE_NCIH2122	-0.678274	0
TEMOZOLOMIDE_CYCLOPHOSPHAMIDE_OV90	11.9831	0
TEMOZOLOMIDE_CYCLOPHOSPHAMIDE_COLO320DM	-4.64437	0
TEMOZOLOMIDE_CYCLOPHOSPHAMIDE_NCIH23	-7.47801	0
TEMOZOLOMIDE_CYCLOPHOSPHAMIDE_UWB1289BRCA1	7.00323	0
TEMOZOLOMIDE_CYCLOPHOSPHAMIDE_NCIH460	16.291	0
TEMOZOLOMIDE_CYCLOPHOSPHAMIDE_UWB1289	-6.44327	0
TEMOZOLOMIDE_GEMCITABINE_LNCAP	7.29554	0
TEMOZOLOMIDE_GEMCITABINE_KPL1	-7.04788	0
TEMOZOLOMIDE_GEMCITABINE_A375	-28.1062	0
TEMOZOLOMIDE_GEMCITABINE_SKOV3	-0.577276	0
TEMOZOLOMIDE_GEMCITABINE_OCUBM	12.1512	0
TEMOZOLOMIDE_GEMCITABINE_A427	4.08224	0
TEMOZOLOMIDE_GEMCITABINE_A2780	0.110191	0
TEMOZOLOMIDE_GEMCITABINE_SKMEL30	-4.16932	0
TEMOZOLOMIDE_GEMCITABINE_HT29	4.62279	0
TEMOZOLOMIDE_GEMCITABINE_PA1	1.13808	0
TEMOZOLOMIDE_GEMCITABINE_SW620	4.3905	0
TEMOZOLOMIDE_GEMCITABINE_SKMES1	-20.6326	0
TEMOZOLOMIDE_GEMCITABINE_MDAMB436	6.82147	0
TEMOZOLOMIDE_GEMCITABINE_MSTO	-1.89223	0
TEMOZOLOMIDE_GEMCITABINE_HT144	-4.09682	0
TEMOZOLOMIDE_GEMCITABINE_NCIH2122	3.6037	0
TEMOZOLOMIDE_GEMCITABINE_COLO320DM	2.02229	0
TEMOZOLOMIDE_GEMCITABINE_NCIH23	-9.58293	0
TEMOZOLOMIDE_GEMCITABINE_UWB1289BRCA1	4.33313	0
TEMOZOLOMIDE_GEMCITABINE_NCIH460	-1.74681	0
TEMOZOLOMIDE_GEMCITABINE_CAOV3	0.314186	0
TEMOZOLOMIDE_ZOLINZA_LNCAP	50.7209	0
TEMOZOLOMIDE_ZOLINZA_KPL1	-8.28981	0
TEMOZOLOMIDE_ZOLINZA_A375	6.52028	0
TEMOZOLOMIDE_ZOLINZA_DLD1	8.7951	0
TEMOZOLOMIDE_ZOLINZA_NCIH1650	-8.96945	0
TEMOZOLOMIDE_ZOLINZA_SKOV3	0.347644	0
TEMOZOLOMIDE_ZOLINZA_VCAP	18.643	0
TEMOZOLOMIDE_ZOLINZA_OCUBM	-7.86721	0
TEMOZOLOMIDE_ZOLINZA_A2058	24.5398	0
TEMOZOLOMIDE_ZOLINZA_A427	-9.06706	0
TEMOZOLOMIDE_ZOLINZA_A2780	9.20623	0
TEMOZOLOMIDE_ZOLINZA_SKMEL30	21.9297	0
TEMOZOLOMIDE_ZOLINZA_NCIH520	5.83616	0
TEMOZOLOMIDE_ZOLINZA_T47D	13.2536	0
TEMOZOLOMIDE_ZOLINZA_UACC62	24.8419	0
TEMOZOLOMIDE_ZOLINZA_SW620	2.06579	0
TEMOZOLOMIDE_ZOLINZA_MDAMB436	13.9598	0
TEMOZOLOMIDE_ZOLINZA_RPMI7951	17.0727	0
TEMOZOLOMIDE_ZOLINZA_LOVO	8.43089	0
TEMOZOLOMIDE_ZOLINZA_MSTO	31.1821	0
TEMOZOLOMIDE_ZOLINZA_NCIH2122	-2.36505	0
TEMOZOLOMIDE_ZOLINZA_COLO320DM	18.0019	0
TEMOZOLOMIDE_ZOLINZA_UWB1289BRCA1	-2.24656	0
TEMOZOLOMIDE_ZOLINZA_HCT116	-5.95182	0
TEMOZOLOMIDE_ZOLINZA_CAOV3	-5.58646	0
TEMOZOLOMIDE_ZOLINZA_UWB1289	22.8999	0
TEMOZOLOMIDE_MK-4827_LNCAP	35.8253	0
TEMOZOLOMIDE_MK-4827_KPL1	-9.80894	0
TEMOZOLOMIDE_MK-4827_A375	81.0868	0
TEMOZOLOMIDE_MK-4827_NCIH1650	34.6115	0
TEMOZOLOMIDE_MK-4827_SKOV3	58.3518	0
TEMOZOLOMIDE_MK-4827_OCUBM	95.4683	0
TEMOZOLOMIDE_MK-4827_A2058	42.2416	0
TEMOZOLOMIDE_MK-4827_RKO	53.1134	0
TEMOZOLOMIDE_MK-4827_A427	45.5824	0
TEMOZOLOMIDE_MK-4827_SKMEL30	36.2525	0
TEMOZOLOMIDE_MK-4827_HT29	57.9463	0
TEMOZOLOMIDE_MK-4827_NCIH520	36.8233	0
TEMOZOLOMIDE_MK-4827_PA1	91.3221	0
TEMOZOLOMIDE_MK-4827_T47D	44.9932	0
TEMOZOLOMIDE_MK-4827_UACC62	46.8582	0
TEMOZOLOMIDE_MK-4827_SW620	30.8974	0
TEMOZOLOMIDE_MK-4827_SKMES1	74.273	0
TEMOZOLOMIDE_MK-4827_RPMI7951	53.0439	0
TEMOZOLOMIDE_MK-4827_LOVO	59.9768	0
TEMOZOLOMIDE_MK-4827_MSTO	81.2917	0
TEMOZOLOMIDE_MK-4827_OVCAR3	18.508	0
TEMOZOLOMIDE_MK-4827_ZR751	20.0084	0
TEMOZOLOMIDE_MK-4827_HT144	23.3088	0
TEMOZOLOMIDE_MK-4827_SW837	18.6759	0
TEMOZOLOMIDE_MK-4827_NCIH2122	42.786	0
TEMOZOLOMIDE_MK-4827_COLO320DM	11.2849	0
TEMOZOLOMIDE_MK-4827_HCT116	59.6426	0
TEMOZOLOMIDE_MK-4827_NCIH460	74.8225	0
TEMOZOLOMIDE_MK-4827_CAOV3	88.2218	0
TEMOZOLOMIDE_MK-4827_UWB1289	63.5036	0
TEMOZOLOMIDE_MITOMYCINE_LNCAP	11.723	0
TEMOZOLOMIDE_MITOMYCINE_KPL1	-29.9511	0
TEMOZOLOMIDE_MITOMYCINE_A375	-5.3641	0
TEMOZOLOMIDE_MITOMYCINE_NCIH1650	-15.4711	0
TEMOZOLOMIDE_MITOMYCINE_VCAP	5.04748	0
TEMOZOLOMIDE_MITOMYCINE_OCUBM	4.22573	0
TEMOZOLOMIDE_MITOMYCINE_A2058	1.23895	0
TEMOZOLOMIDE_MITOMYCINE_EFM192B	8.15656	0
TEMOZOLOMIDE_MITOMYCINE_SKMEL30	-3.10732	0
TEMOZOLOMIDE_MITOMYCINE_HT29	10.7405	0
TEMOZOLOMIDE_MITOMYCINE_UACC62	16.0104	0
TEMOZOLOMIDE_MITOMYCINE_SW620	11.785	0
TEMOZOLOMIDE_MITOMYCINE_SKMES1	4.87994	0
TEMOZOLOMIDE_MITOMYCINE_MDAMB436	5.75527	0
TEMOZOLOMIDE_MITOMYCINE_LOVO	9.69291	0
TEMOZOLOMIDE_MITOMYCINE_ZR751	-52.0443	0
TEMOZOLOMIDE_MITOMYCINE_HT144	-11.4608	0
TEMOZOLOMIDE_MITOMYCINE_SW837	4.97317	0
TEMOZOLOMIDE_MITOMYCINE_NCIH2122	-7.89542	0
TEMOZOLOMIDE_MITOMYCINE_COLO320DM	-1.67714	0
TEMOZOLOMIDE_MITOMYCINE_UWB1289	15.1118	0
TEMOZOLOMIDE_CARBOPLATIN_KPL1	2.09152	0
TEMOZOLOMIDE_CARBOPLATIN_DLD1	-19.1016	0
TEMOZOLOMIDE_CARBOPLATIN_NCIH1650	-35.0089	0
TEMOZOLOMIDE_CARBOPLATIN_VCAP	-19.6588	0
TEMOZOLOMIDE_CARBOPLATIN_OCUBM	-10.9671	0
TEMOZOLOMIDE_CARBOPLATIN_RKO	-1.23113	0
TEMOZOLOMIDE_CARBOPLATIN_A427	-11.5781	0
TEMOZOLOMIDE_CARBOPLATIN_EFM192B	-30.6294	0
TEMOZOLOMIDE_CARBOPLATIN_SKMEL30	5.81346	0
TEMOZOLOMIDE_CARBOPLATIN_HT29	-13.2484	0
TEMOZOLOMIDE_CARBOPLATIN_NCIH520	-2.4308	0
TEMOZOLOMIDE_CARBOPLATIN_T47D	-136.91	0
TEMOZOLOMIDE_CARBOPLATIN_UACC62	-11.9999	0
TEMOZOLOMIDE_CARBOPLATIN_SKMES1	-10.6927	0
TEMOZOLOMIDE_CARBOPLATIN_ES2	-9.0364	0
TEMOZOLOMIDE_CARBOPLATIN_RPMI7951	2.08771	0
TEMOZOLOMIDE_CARBOPLATIN_LOVO	4.52376	0
TEMOZOLOMIDE_CARBOPLATIN_MSTO	-24.5374	0
TEMOZOLOMIDE_CARBOPLATIN_ZR751	-41.8173	0
TEMOZOLOMIDE_CARBOPLATIN_NCIH2122	-18.4284	0
TEMOZOLOMIDE_CARBOPLATIN_OV90	-10.5469	0
TEMOZOLOMIDE_CARBOPLATIN_COLO320DM	-0.999442	0
TEMOZOLOMIDE_CARBOPLATIN_NCIH23	-35.4503	0
TEMOZOLOMIDE_CARBOPLATIN_HCT116	-9.32167	0
TEMOZOLOMIDE_CARBOPLATIN_CAOV3	-36.3612	0
TEMOZOLOMIDE_CARBOPLATIN_UWB1289	5.89195	0
TEMOZOLOMIDE_MK-8776_LNCAP	18.6203	0
TEMOZOLOMIDE_MK-8776_KPL1	-17.3344	0
TEMOZOLOMIDE_MK-8776_DLD1	-3.53471	0
TEMOZOLOMIDE_MK-8776_OCUBM	16.1048	0
TEMOZOLOMIDE_MK-8776_A2058	128.322	0
TEMOZOLOMIDE_MK-8776_RKO	4.90589	0
TEMOZOLOMIDE_MK-8776_A427	91.0608	0
TEMOZOLOMIDE_MK-8776_A2780	2.41061	0
TEMOZOLOMIDE_MK-8776_EFM192B	9.33166	0
TEMOZOLOMIDE_MK-8776_HT29	-9.35866	0
TEMOZOLOMIDE_MK-8776_NCIH520	4.63165	0
TEMOZOLOMIDE_MK-8776_PA1	6.89274	0
TEMOZOLOMIDE_MK-8776_T47D	-35.2736	0
TEMOZOLOMIDE_MK-8776_UACC62	7.28675	0
TEMOZOLOMIDE_MK-8776_SW620	36.6453	0
TEMOZOLOMIDE_MK-8776_SKMES1	-4.30293	0
TEMOZOLOMIDE_MK-8776_ES2	9.13025	0
TEMOZOLOMIDE_MK-8776_OVCAR3	3.65518	0
TEMOZOLOMIDE_MK-8776_ZR751	-50.1732	0
TEMOZOLOMIDE_MK-8776_HT144	0.564177	0
TEMOZOLOMIDE_MK-8776_SW837	-35.3048	0
TEMOZOLOMIDE_MK-8776_NCIH2122	-19.6646	0
TEMOZOLOMIDE_MK-8776_OV90	17.6517	0
TEMOZOLOMIDE_MK-8776_COLO320DM	50.7265	0
TEMOZOLOMIDE_MK-8776_NCIH23	-78.8906	0
TEMOZOLOMIDE_MK-8776_HCT116	-1.41158	0
TEMOZOLOMIDE_MK-8776_NCIH460	-9.21821	0
TEMOZOLOMIDE_MK-8776_CAOV3	4.46254	0
TEMOZOLOMIDE_BORTEZOMIB_LNCAP	-1.72894	0
TEMOZOLOMIDE_BORTEZOMIB_KPL1	-26.2703	0
TEMOZOLOMIDE_BORTEZOMIB_A375	15.1342	0
TEMOZOLOMIDE_BORTEZOMIB_DLD1	8.35292	0
TEMOZOLOMIDE_BORTEZOMIB_NCIH1650	-30.0571	0
TEMOZOLOMIDE_BORTEZOMIB_VCAP	-12.5438	0
TEMOZOLOMIDE_BORTEZOMIB_OCUBM	-5.06828	0
TEMOZOLOMIDE_BORTEZOMIB_A2058	13.5453	0
TEMOZOLOMIDE_BORTEZOMIB_RKO	-26.6091	0
TEMOZOLOMIDE_BORTEZOMIB_A427	-6.87047	0
TEMOZOLOMIDE_BORTEZOMIB_EFM192B	-30.193	0
TEMOZOLOMIDE_BORTEZOMIB_SKMEL30	-0.950885	0
TEMOZOLOMIDE_BORTEZOMIB_PA1	-9.68215	0
TEMOZOLOMIDE_BORTEZOMIB_T47D	-20.7969	0
TEMOZOLOMIDE_BORTEZOMIB_UACC62	-18.6774	0
TEMOZOLOMIDE_BORTEZOMIB_SW620	-2.14141	0
TEMOZOLOMIDE_BORTEZOMIB_SKMES1	-9.25644	0
TEMOZOLOMIDE_BORTEZOMIB_ES2	-20.0952	0
TEMOZOLOMIDE_BORTEZOMIB_MDAMB436	-2.68755	0
TEMOZOLOMIDE_BORTEZOMIB_OVCAR3	-18.8894	0
TEMOZOLOMIDE_BORTEZOMIB_HT144	-22.5143	0
TEMOZOLOMIDE_BORTEZOMIB_SW837	-15.0522	0
TEMOZOLOMIDE_BORTEZOMIB_NCIH23	-26.3835	0
TEMOZOLOMIDE_BORTEZOMIB_UWB1289	-10.4072	0
TEMOZOLOMIDE_SN-38_LNCAP	3.93269	0
TEMOZOLOMIDE_SN-38_KPL1	-17.3908	0
TEMOZOLOMIDE_SN-38_DLD1	-14.2318	0
TEMOZOLOMIDE_SN-38_SKOV3	-22.2105	0
TEMOZOLOMIDE_SN-38_VCAP	-12.4338	0
TEMOZOLOMIDE_SN-38_OCUBM	-8.24493	0
TEMOZOLOMIDE_SN-38_A2058	8.48293	0
TEMOZOLOMIDE_SN-38_A427	6.07254	0
TEMOZOLOMIDE_SN-38_A2780	3.41349	0
TEMOZOLOMIDE_SN-38_EFM192B	-36.393	0
TEMOZOLOMIDE_SN-38_NCIH520	-8.99142	0
TEMOZOLOMIDE_SN-38_T47D	-81.0932	0
TEMOZOLOMIDE_SN-38_UACC62	-5.23567	0
TEMOZOLOMIDE_SN-38_SW620	8.96966	0
TEMOZOLOMIDE_SN-38_SKMES1	4.80499	0
TEMOZOLOMIDE_SN-38_RPMI7951	-4.02766	0
TEMOZOLOMIDE_SN-38_MSTO	-2.31777	0
TEMOZOLOMIDE_SN-38_OVCAR3	4.75312	0
TEMOZOLOMIDE_SN-38_ZR751	-64.4799	0
TEMOZOLOMIDE_SN-38_HT144	-35.945	0
TEMOZOLOMIDE_SN-38_SW837	-37.071	0
TEMOZOLOMIDE_SN-38_NCIH2122	-13.7263	0
TEMOZOLOMIDE_SN-38_COLO320DM	0.11347	0
TEMOZOLOMIDE_SN-38_NCIH23	-19.767	0
TEMOZOLOMIDE_SN-38_UWB1289BRCA1	9.12816	0
TEMOZOLOMIDE_SN-38_HCT116	-9.55694	0
TEMOZOLOMIDE_SN-38_CAOV3	-38.3577	0
TEMOZOLOMIDE_SN-38_UWB1289	14.0461	0
TEMOZOLOMIDE_DEXAMETHASONE_KPL1	-6.50455	0
TEMOZOLOMIDE_DEXAMETHASONE_A375	-1.5949	0
TEMOZOLOMIDE_DEXAMETHASONE_DLD1	-5.85669	0
TEMOZOLOMIDE_DEXAMETHASONE_SKOV3	-6.29119	0
TEMOZOLOMIDE_DEXAMETHASONE_VCAP	-21.6989	0
TEMOZOLOMIDE_DEXAMETHASONE_OCUBM	9.00201	0
TEMOZOLOMIDE_DEXAMETHASONE_RKO	7.36543	0
TEMOZOLOMIDE_DEXAMETHASONE_A427	-7.17231	0
TEMOZOLOMIDE_DEXAMETHASONE_A2780	-3.03963	0
TEMOZOLOMIDE_DEXAMETHASONE_EFM192B	-27.1799	0
TEMOZOLOMIDE_DEXAMETHASONE_HT29	-9.88469	0
TEMOZOLOMIDE_DEXAMETHASONE_PA1	4.7811	0
TEMOZOLOMIDE_DEXAMETHASONE_T47D	-66.1668	0
TEMOZOLOMIDE_DEXAMETHASONE_UACC62	11.3949	0
TEMOZOLOMIDE_DEXAMETHASONE_SW620	-1.47174	0
TEMOZOLOMIDE_DEXAMETHASONE_SKMES1	-3.53363	0
TEMOZOLOMIDE_DEXAMETHASONE_ES2	-19.4231	0
TEMOZOLOMIDE_DEXAMETHASONE_MDAMB436	-2.33721	0
TEMOZOLOMIDE_DEXAMETHASONE_LOVO	-11.966	0
TEMOZOLOMIDE_DEXAMETHASONE_MSTO	-19.7837	0
TEMOZOLOMIDE_DEXAMETHASONE_ZR751	-61.9562	0
TEMOZOLOMIDE_DEXAMETHASONE_HT144	-32.5507	0
TEMOZOLOMIDE_DEXAMETHASONE_NCIH2122	-4.29796	0
TEMOZOLOMIDE_DEXAMETHASONE_COLO320DM	2.24695	0
TEMOZOLOMIDE_DEXAMETHASONE_NCIH23	-0.810553	0
TEMOZOLOMIDE_DEXAMETHASONE_HCT116	1.33282	0
TEMOZOLOMIDE_DEXAMETHASONE_NCIH460	1.01681	0
TEMOZOLOMIDE_DEXAMETHASONE_CAOV3	-54.6542	0
TEMOZOLOMIDE_DEXAMETHASONE_UWB1289	-5.06024	0
TEMOZOLOMIDE_ERLOTINIB_LNCAP	0.660922	0
TEMOZOLOMIDE_ERLOTINIB_KPL1	0.88427	0
TEMOZOLOMIDE_ERLOTINIB_A375	14.6507	0
TEMOZOLOMIDE_ERLOTINIB_NCIH1650	-31.2325	0
TEMOZOLOMIDE_ERLOTINIB_VCAP	10.9042	0
TEMOZOLOMIDE_ERLOTINIB_RKO	-14.282	0
TEMOZOLOMIDE_ERLOTINIB_SKMEL30	17.0801	0
TEMOZOLOMIDE_ERLOTINIB_HT29	-0.926017	0
TEMOZOLOMIDE_ERLOTINIB_NCIH520	19.5173	0
TEMOZOLOMIDE_ERLOTINIB_PA1	-2.91182	0
TEMOZOLOMIDE_ERLOTINIB_T47D	-25.7561	0
TEMOZOLOMIDE_ERLOTINIB_UACC62	28.7912	0
TEMOZOLOMIDE_ERLOTINIB_SW620	15.7176	0
TEMOZOLOMIDE_ERLOTINIB_SKMES1	11.3611	0
TEMOZOLOMIDE_ERLOTINIB_MDAMB436	-3.48364	0
TEMOZOLOMIDE_ERLOTINIB_RPMI7951	16.0056	0
TEMOZOLOMIDE_ERLOTINIB_LOVO	-9.5793	0
TEMOZOLOMIDE_ERLOTINIB_MSTO	-49.2352	0
TEMOZOLOMIDE_ERLOTINIB_OVCAR3	-26.0162	0
TEMOZOLOMIDE_ERLOTINIB_ZR751	-53.828	0
TEMOZOLOMIDE_ERLOTINIB_HT144	-5.28546	0
TEMOZOLOMIDE_ERLOTINIB_SW837	15.1793	0
TEMOZOLOMIDE_ERLOTINIB_OV90	-0.248809	0
TEMOZOLOMIDE_ERLOTINIB_UWB1289BRCA1	9.99028	0
TEMOZOLOMIDE_ERLOTINIB_NCIH460	13.9249	0
TEMOZOLOMIDE_ERLOTINIB_CAOV3	-36.2607	0
TEMOZOLOMIDE_ERLOTINIB_UWB1289	22.5837	0
TEMOZOLOMIDE_DINACICLIB_KPL1	-11.2152	0
TEMOZOLOMIDE_DINACICLIB_A375	-4.03012	0
TEMOZOLOMIDE_DINACICLIB_DLD1	5.969	0
TEMOZOLOMIDE_DINACICLIB_NCIH1650	-5.22959	0
TEMOZOLOMIDE_DINACICLIB_SKOV3	-8.71555	0
TEMOZOLOMIDE_DINACICLIB_OCUBM	6.40899	0
TEMOZOLOMIDE_DINACICLIB_A427	14.5179	0
TEMOZOLOMIDE_DINACICLIB_A2780	3.84262	0
TEMOZOLOMIDE_DINACICLIB_SKMEL30	0.0844341	0
TEMOZOLOMIDE_DINACICLIB_HT29	-8.58276	0
TEMOZOLOMIDE_DINACICLIB_NCIH520	-8.63265	0
TEMOZOLOMIDE_DINACICLIB_PA1	-8.61173	0
TEMOZOLOMIDE_DINACICLIB_UACC62	15.2676	0
TEMOZOLOMIDE_DINACICLIB_SW620	5.38202	0
TEMOZOLOMIDE_DINACICLIB_SKMES1	7.82022	0
TEMOZOLOMIDE_DINACICLIB_ES2	3.1511	0
TEMOZOLOMIDE_DINACICLIB_RPMI7951	12.7082	0
TEMOZOLOMIDE_DINACICLIB_LOVO	-11.8964	0
TEMOZOLOMIDE_DINACICLIB_OVCAR3	6.09981	0
TEMOZOLOMIDE_DINACICLIB_HT144	-112.899	0
TEMOZOLOMIDE_DINACICLIB_OV90	-3.63867	0
TEMOZOLOMIDE_DINACICLIB_COLO320DM	4.80254	0
TEMOZOLOMIDE_DINACICLIB_NCIH23	-6.16634	0
TEMOZOLOMIDE_DINACICLIB_UWB1289BRCA1	20.0722	0
TEMOZOLOMIDE_DINACICLIB_CAOV3	-16.6939	0
TEMOZOLOMIDE_DINACICLIB_UWB1289	0.718667	0
TEMOZOLOMIDE_SUNITINIB_KPL1	6.31947	0
TEMOZOLOMIDE_SUNITINIB_A375	7.89459	0
TEMOZOLOMIDE_SUNITINIB_NCIH1650	-2.18676	0
TEMOZOLOMIDE_SUNITINIB_SKOV3	11.1998	0
TEMOZOLOMIDE_SUNITINIB_OCUBM	-4.16494	0
TEMOZOLOMIDE_SUNITINIB_A2058	3.02092	0
TEMOZOLOMIDE_SUNITINIB_A427	26.7037	0
TEMOZOLOMIDE_SUNITINIB_A2780	15.3818	0
TEMOZOLOMIDE_SUNITINIB_EFM192B	-5.50903	0
TEMOZOLOMIDE_SUNITINIB_NCIH520	12.8511	0
TEMOZOLOMIDE_SUNITINIB_T47D	0.432691	0
TEMOZOLOMIDE_SUNITINIB_UACC62	11.3086	0
TEMOZOLOMIDE_SUNITINIB_SW620	16.4516	0
TEMOZOLOMIDE_SUNITINIB_SKMES1	20.6477	0
TEMOZOLOMIDE_SUNITINIB_MDAMB436	6.61273	0
TEMOZOLOMIDE_SUNITINIB_OVCAR3	6.12891	0
TEMOZOLOMIDE_SUNITINIB_ZR751	-20.7169	0
TEMOZOLOMIDE_SUNITINIB_HT144	-6.55732	0
TEMOZOLOMIDE_SUNITINIB_SW837	-9.05246	0
TEMOZOLOMIDE_SUNITINIB_OV90	0.0242759	0
TEMOZOLOMIDE_SUNITINIB_NCIH23	-4.13645	0
TEMOZOLOMIDE_SUNITINIB_HCT116	18.1607	0
TEMOZOLOMIDE_SUNITINIB_NCIH460	0.684324	0
TEMOZOLOMIDE_SUNITINIB_UWB1289	12.5013	0
TEMOZOLOMIDE_OXALIPLATIN_KPL1	6.48655	0
TEMOZOLOMIDE_OXALIPLATIN_NCIH1650	-27.5603	0
TEMOZOLOMIDE_OXALIPLATIN_RKO	25.1805	0
TEMOZOLOMIDE_OXALIPLATIN_A427	-0.593112	0
TEMOZOLOMIDE_OXALIPLATIN_HT29	-17.0893	0
TEMOZOLOMIDE_OXALIPLATIN_NCIH520	-8.75563	0
TEMOZOLOMIDE_OXALIPLATIN_T47D	17.8837	0
TEMOZOLOMIDE_OXALIPLATIN_UACC62	-15.6062	0
TEMOZOLOMIDE_OXALIPLATIN_SW620	-0.625148	0
TEMOZOLOMIDE_OXALIPLATIN_SKMES1	-6.61365	0
TEMOZOLOMIDE_OXALIPLATIN_ES2	-10.304	0
TEMOZOLOMIDE_OXALIPLATIN_MDAMB436	-20.7498	0
TEMOZOLOMIDE_OXALIPLATIN_RPMI7951	-15.2425	0
TEMOZOLOMIDE_OXALIPLATIN_LOVO	-34.2197	0
TEMOZOLOMIDE_OXALIPLATIN_MSTO	-35.637	0
TEMOZOLOMIDE_OXALIPLATIN_OVCAR3	-25.5916	0
TEMOZOLOMIDE_OXALIPLATIN_ZR751	-58.876	0
TEMOZOLOMIDE_OXALIPLATIN_HT144	-24.3497	0
TEMOZOLOMIDE_OXALIPLATIN_SW837	-23.1506	0
TEMOZOLOMIDE_OXALIPLATIN_NCIH2122	-4.84033	0
TEMOZOLOMIDE_OXALIPLATIN_OV90	-11.4532	0
TEMOZOLOMIDE_OXALIPLATIN_NCIH23	-37.3306	0
TEMOZOLOMIDE_OXALIPLATIN_UWB1289BRCA1	-22.8183	0
TEMOZOLOMIDE_OXALIPLATIN_HCT116	5.69985	0
TEMOZOLOMIDE_OXALIPLATIN_NCIH460	-32.8377	0
TEMOZOLOMIDE_OXALIPLATIN_CAOV3	-76.5686	0
TEMOZOLOMIDE_OXALIPLATIN_UWB1289	-8.14971	0
TEMOZOLOMIDE_L778123_KPL1	-26.0148	0
TEMOZOLOMIDE_L778123_DLD1	2.54457	0
TEMOZOLOMIDE_L778123_SKOV3	3.9414	0
TEMOZOLOMIDE_L778123_VCAP	15.6242	0
TEMOZOLOMIDE_L778123_OCUBM	-3.64057	0
TEMOZOLOMIDE_L778123_A2058	38.5391	0
TEMOZOLOMIDE_L778123_EFM192B	-20.4347	0
TEMOZOLOMIDE_L778123_SKMEL30	9.16166	0
TEMOZOLOMIDE_L778123_HT29	5.43572	0
TEMOZOLOMIDE_L778123_NCIH520	4.60461	0
TEMOZOLOMIDE_L778123_T47D	-31.6832	0
TEMOZOLOMIDE_L778123_UACC62	4.84258	0
TEMOZOLOMIDE_L778123_SW620	-7.62365	0
TEMOZOLOMIDE_L778123_SKMES1	9.86526	0
TEMOZOLOMIDE_L778123_RPMI7951	8.37853	0
TEMOZOLOMIDE_L778123_LOVO	4.86755	0
TEMOZOLOMIDE_L778123_MSTO	8.56759	0
TEMOZOLOMIDE_L778123_OVCAR3	-9.79937	0
TEMOZOLOMIDE_L778123_ZR751	-29.4078	0
TEMOZOLOMIDE_L778123_SW837	14.5307	0
TEMOZOLOMIDE_L778123_NCIH2122	0.113028	0
TEMOZOLOMIDE_L778123_COLO320DM	7.35698	0
TEMOZOLOMIDE_L778123_UWB1289BRCA1	17.6936	0
TEMOZOLOMIDE_L778123_HCT116	-9.15597	0
TEMOZOLOMIDE_L778123_NCIH460	0.591419	0
TEMOZOLOMIDE_L778123_CAOV3	-9.49757	0
TEMOZOLOMIDE_MK-2206_LNCAP	4.91293	0
TEMOZOLOMIDE_MK-2206_KPL1	24.6335	0
TEMOZOLOMIDE_MK-2206_A375	8.58911	0
TEMOZOLOMIDE_MK-2206_VCAP	-10.8935	0
TEMOZOLOMIDE_MK-2206_OCUBM	-14.0082	0
TEMOZOLOMIDE_MK-2206_A2058	14.2553	0
TEMOZOLOMIDE_MK-2206_RKO	18.634	0
TEMOZOLOMIDE_MK-2206_A427	30.4535	0
TEMOZOLOMIDE_MK-2206_EFM192B	-17.1516	0
TEMOZOLOMIDE_MK-2206_SKMEL30	29.6722	0
TEMOZOLOMIDE_MK-2206_NCIH520	-3.18407	0
TEMOZOLOMIDE_MK-2206_T47D	-31.4935	0
TEMOZOLOMIDE_MK-2206_UACC62	22.9684	0
TEMOZOLOMIDE_MK-2206_SW620	13.543	0
TEMOZOLOMIDE_MK-2206_ES2	-6.68577	0
TEMOZOLOMIDE_MK-2206_RPMI7951	24.9712	0
TEMOZOLOMIDE_MK-2206_MSTO	31.0736	0
TEMOZOLOMIDE_MK-2206_OVCAR3	-14.3833	0
TEMOZOLOMIDE_MK-2206_ZR751	5.04649	0
TEMOZOLOMIDE_MK-2206_SW837	-5.94858	0
TEMOZOLOMIDE_MK-2206_NCIH2122	-5.93156	0
TEMOZOLOMIDE_MK-2206_OV90	19.1956	0
TEMOZOLOMIDE_MK-2206_UWB1289BRCA1	25.381	0
TEMOZOLOMIDE_MK-2206_HCT116	-1.58848	0
TEMOZOLOMIDE_MK-2206_NCIH460	9.71424	0
TEMOZOLOMIDE_MK-2206_CAOV3	5.22643	0
TEMOZOLOMIDE_TOPOTECAN_KPL1	-8.37217	0
TEMOZOLOMIDE_TOPOTECAN_A375	6.19162	0
TEMOZOLOMIDE_TOPOTECAN_DLD1	13.7658	0
TEMOZOLOMIDE_TOPOTECAN_NCIH1650	-7.10453	0
TEMOZOLOMIDE_TOPOTECAN_SKOV3	-14.2078	0
TEMOZOLOMIDE_TOPOTECAN_OCUBM	-6.28916	0
TEMOZOLOMIDE_TOPOTECAN_EFM192B	1.39805	0
TEMOZOLOMIDE_TOPOTECAN_SKMEL30	20.6515	0
TEMOZOLOMIDE_TOPOTECAN_HT29	13.504	0
TEMOZOLOMIDE_TOPOTECAN_T47D	8.44208	0
TEMOZOLOMIDE_TOPOTECAN_UACC62	11.7004	0
TEMOZOLOMIDE_TOPOTECAN_SW620	12.6753	0
TEMOZOLOMIDE_TOPOTECAN_SKMES1	22.1666	0
TEMOZOLOMIDE_TOPOTECAN_ES2	10.2026	0
TEMOZOLOMIDE_TOPOTECAN_MDAMB436	4.26889	0
TEMOZOLOMIDE_TOPOTECAN_RPMI7951	6.24593	0
TEMOZOLOMIDE_TOPOTECAN_MSTO	11.8076	0
TEMOZOLOMIDE_TOPOTECAN_ZR751	-29.6825	0
TEMOZOLOMIDE_TOPOTECAN_NCIH2122	5.04227	0
TEMOZOLOMIDE_TOPOTECAN_OV90	8.39576	0
TEMOZOLOMIDE_TOPOTECAN_COLO320DM	2.44744	0
TEMOZOLOMIDE_TOPOTECAN_NCIH23	3.03264	0
TEMOZOLOMIDE_TOPOTECAN_UWB1289BRCA1	9.02531	0
TEMOZOLOMIDE_TOPOTECAN_HCT116	7.75555	0
TEMOZOLOMIDE_TOPOTECAN_CAOV3	9.41864	0
TEMOZOLOMIDE_MK-4541_A375	-8.79064	0
TEMOZOLOMIDE_MK-4541_NCIH1650	-31.7893	0
TEMOZOLOMIDE_MK-4541_SKOV3	-18.1585	0
TEMOZOLOMIDE_MK-4541_VCAP	3.62198	0
TEMOZOLOMIDE_MK-4541_OCUBM	-30.0513	0
TEMOZOLOMIDE_MK-4541_A2058	3.31241	0
TEMOZOLOMIDE_MK-4541_RKO	0.0357898	0
TEMOZOLOMIDE_MK-4541_A427	-4.37236	0
TEMOZOLOMIDE_MK-4541_A2780	-9.2045	0
TEMOZOLOMIDE_MK-4541_SKMEL30	15.4794	0
TEMOZOLOMIDE_MK-4541_HT29	-1.86373	0
TEMOZOLOMIDE_MK-4541_NCIH520	-5.41354	0
TEMOZOLOMIDE_MK-4541_PA1	-4.83042	0
TEMOZOLOMIDE_MK-4541_SW620	1.36923	0
TEMOZOLOMIDE_MK-4541_SKMES1	-7.94025	0
TEMOZOLOMIDE_MK-4541_ES2	-5.45048	0
TEMOZOLOMIDE_MK-4541_MDAMB436	1.33862	0
TEMOZOLOMIDE_MK-4541_LOVO	-25.8372	0
TEMOZOLOMIDE_MK-4541_MSTO	-52.304	0
TEMOZOLOMIDE_MK-4541_OVCAR3	-39.9245	0
TEMOZOLOMIDE_MK-4541_ZR751	-102.137	0
TEMOZOLOMIDE_MK-4541_SW837	-28.6835	0
TEMOZOLOMIDE_MK-4541_OV90	-11.8066	0
TEMOZOLOMIDE_MK-4541_UWB1289BRCA1	13.7188	0
TEMOZOLOMIDE_MK-4541_HCT116	-13.0871	0
TEMOZOLOMIDE_MK-4541_NCIH460	-11.9517	0
TEMOZOLOMIDE_MK-4541_UWB1289	-17.7243	0
TEMOZOLOMIDE_METHOTREXATE_LNCAP	-21.3488	0
TEMOZOLOMIDE_METHOTREXATE_A375	-16.0572	0
TEMOZOLOMIDE_METHOTREXATE_DLD1	-3.98989	0
TEMOZOLOMIDE_METHOTREXATE_VCAP	-44.0228	0
TEMOZOLOMIDE_METHOTREXATE_A427	-12.8981	0
TEMOZOLOMIDE_METHOTREXATE_EFM192B	-9.55247	0
TEMOZOLOMIDE_METHOTREXATE_SKMEL30	3.48748	0
TEMOZOLOMIDE_METHOTREXATE_T47D	-70.7679	0
TEMOZOLOMIDE_METHOTREXATE_SKMES1	-32.4603	0
TEMOZOLOMIDE_METHOTREXATE_ES2	-12.5926	0
TEMOZOLOMIDE_METHOTREXATE_MDAMB436	-7.23672	0
TEMOZOLOMIDE_METHOTREXATE_RPMI7951	-11.7573	0
TEMOZOLOMIDE_METHOTREXATE_OVCAR3	-22.983	0
TEMOZOLOMIDE_METHOTREXATE_ZR751	-65.9197	0
TEMOZOLOMIDE_METHOTREXATE_HT144	-11.5613	0
TEMOZOLOMIDE_METHOTREXATE_SW837	-38.6698	0
TEMOZOLOMIDE_METHOTREXATE_NCIH2122	-4.23498	0
TEMOZOLOMIDE_METHOTREXATE_OV90	0.732642	0
TEMOZOLOMIDE_METHOTREXATE_COLO320DM	-18.5646	0
TEMOZOLOMIDE_METHOTREXATE_UWB1289BRCA1	-8.77869	0
TEMOZOLOMIDE_METHOTREXATE_HCT116	-39.8395	0
TEMOZOLOMIDE_METHOTREXATE_CAOV3	-40.8251	0
TEMOZOLOMIDE_METHOTREXATE_UWB1289	-11.1129	0
TEMOZOLOMIDE_MK-5108_LNCAP	-77.0883	0
TEMOZOLOMIDE_MK-5108_KPL1	-29.7191	0
TEMOZOLOMIDE_MK-5108_A375	0.0644123	0
TEMOZOLOMIDE_MK-5108_DLD1	2.51077	0
TEMOZOLOMIDE_MK-5108_NCIH1650	-12.6138	0
TEMOZOLOMIDE_MK-5108_OCUBM	6.22004	0
TEMOZOLOMIDE_MK-5108_A2780	-2.50016	0
TEMOZOLOMIDE_MK-5108_HT29	5.74867	0
TEMOZOLOMIDE_MK-5108_NCIH520	-14.938	0
TEMOZOLOMIDE_MK-5108_PA1	4.73106	0
TEMOZOLOMIDE_MK-5108_T47D	-12.13	0
TEMOZOLOMIDE_MK-5108_UACC62	-2.8924	0
TEMOZOLOMIDE_MK-5108_SW620	7.80289	0
TEMOZOLOMIDE_MK-5108_SKMES1	-4.26322	0
TEMOZOLOMIDE_MK-5108_ES2	-10.2772	0
TEMOZOLOMIDE_MK-5108_MDAMB436	4.55061	0
TEMOZOLOMIDE_MK-5108_RPMI7951	7.29673	0
TEMOZOLOMIDE_MK-5108_MSTO	-11.1868	0
TEMOZOLOMIDE_MK-5108_OVCAR3	-10.296	0
TEMOZOLOMIDE_MK-5108_ZR751	-62.026	0
TEMOZOLOMIDE_MK-5108_HT144	-9.09489	0
TEMOZOLOMIDE_MK-5108_SW837	13.1679	0
TEMOZOLOMIDE_MK-5108_NCIH2122	-9.13304	0
TEMOZOLOMIDE_MK-5108_OV90	-2.13505	0
TEMOZOLOMIDE_MK-5108_NCIH23	5.57439	0
TEMOZOLOMIDE_MK-5108_NCIH460	-19.0301	0
TEMOZOLOMIDE_SORAFENIB_LNCAP	-11.4423	0
TEMOZOLOMIDE_SORAFENIB_A375	11.6028	0
TEMOZOLOMIDE_SORAFENIB_DLD1	12.3748	0
TEMOZOLOMIDE_SORAFENIB_NCIH1650	-5.47525	0
TEMOZOLOMIDE_SORAFENIB_SKOV3	11.9884	0
TEMOZOLOMIDE_SORAFENIB_VCAP	12.2403	0
TEMOZOLOMIDE_SORAFENIB_A2058	-1.01957	0
TEMOZOLOMIDE_SORAFENIB_A427	22.6807	0
TEMOZOLOMIDE_SORAFENIB_A2780	4.70347	0
TEMOZOLOMIDE_SORAFENIB_EFM192B	-4.21487	0
TEMOZOLOMIDE_SORAFENIB_HT29	-3.10636	0
TEMOZOLOMIDE_SORAFENIB_NCIH520	13.8221	0
TEMOZOLOMIDE_SORAFENIB_PA1	13.322	0
TEMOZOLOMIDE_SORAFENIB_T47D	13.22	0
TEMOZOLOMIDE_SORAFENIB_SW620	5.61106	0
TEMOZOLOMIDE_SORAFENIB_SKMES1	24.5977	0
TEMOZOLOMIDE_SORAFENIB_ES2	3.1861	0
TEMOZOLOMIDE_SORAFENIB_RPMI7951	-2.72505	0
TEMOZOLOMIDE_SORAFENIB_LOVO	-7.36138	0
TEMOZOLOMIDE_SORAFENIB_MSTO	-11.0911	0
TEMOZOLOMIDE_SORAFENIB_OVCAR3	-11.4924	0
TEMOZOLOMIDE_SORAFENIB_ZR751	-34.877	0
TEMOZOLOMIDE_SORAFENIB_SW837	4.57649	0
TEMOZOLOMIDE_SORAFENIB_NCIH2122	-2.43907	0
TEMOZOLOMIDE_SORAFENIB_COLO320DM	10.7804	0
TEMOZOLOMIDE_SORAFENIB_NCIH23	-0.344796	0
TEMOZOLOMIDE_SORAFENIB_HCT116	10.8974	0
TEMOZOLOMIDE_SORAFENIB_UWB1289	7.97118	0
TEMOZOLOMIDE_BEZ-235_LNCAP	97.1355	0
TEMOZOLOMIDE_BEZ-235_KPL1	14.4406	0
TEMOZOLOMIDE_BEZ-235_NCIH1650	8.09948	0
TEMOZOLOMIDE_BEZ-235_A2058	19.671	0
TEMOZOLOMIDE_BEZ-235_RKO	-11.9422	0
TEMOZOLOMIDE_BEZ-235_A427	51.5845	0
TEMOZOLOMIDE_BEZ-235_A2780	27.7978	0
TEMOZOLOMIDE_BEZ-235_EFM192B	13.0449	0
TEMOZOLOMIDE_BEZ-235_SKMEL30	44.4979	0
TEMOZOLOMIDE_BEZ-235_HT29	20.7131	0
TEMOZOLOMIDE_BEZ-235_T47D	125.533	0
TEMOZOLOMIDE_BEZ-235_UACC62	29.6751	0
TEMOZOLOMIDE_BEZ-235_SKMES1	45.5747	0
TEMOZOLOMIDE_BEZ-235_LOVO	22.2447	0
TEMOZOLOMIDE_BEZ-235_MSTO	45.0292	0
TEMOZOLOMIDE_BEZ-235_ZR751	7.93077	0
TEMOZOLOMIDE_BEZ-235_HT144	11.3382	0
TEMOZOLOMIDE_BEZ-235_NCIH2122	6.73862	0
TEMOZOLOMIDE_BEZ-235_OV90	24.8744	0
TEMOZOLOMIDE_BEZ-235_COLO320DM	34.755	0
TEMOZOLOMIDE_BEZ-235_UWB1289BRCA1	41.3932	0
TEMOZOLOMIDE_BEZ-235_NCIH460	23.5558	0
TEMOZOLOMIDE_BEZ-235_UWB1289	39.3829	0
TEMOZOLOMIDE_PD325901_LNCAP	-5.51618	0
TEMOZOLOMIDE_PD325901_A375	-0.477552	0
TEMOZOLOMIDE_PD325901_DLD1	3.56838	0
TEMOZOLOMIDE_PD325901_NCIH1650	-23.9187	0
TEMOZOLOMIDE_PD325901_VCAP	-31.4359	0
TEMOZOLOMIDE_PD325901_RKO	1.35939	0
TEMOZOLOMIDE_PD325901_A427	43.1926	0
TEMOZOLOMIDE_PD325901_A2780	11.5277	0
TEMOZOLOMIDE_PD325901_EFM192B	-45.7788	0
TEMOZOLOMIDE_PD325901_SKMEL30	2.43836	0
TEMOZOLOMIDE_PD325901_PA1	8.90835	0
TEMOZOLOMIDE_PD325901_UACC62	-10.3782	0
TEMOZOLOMIDE_PD325901_SKMES1	-15.0644	0
TEMOZOLOMIDE_PD325901_ES2	46.5106	0
TEMOZOLOMIDE_PD325901_MDAMB436	4.97025	0
TEMOZOLOMIDE_PD325901_RPMI7951	21.9045	0
TEMOZOLOMIDE_PD325901_OVCAR3	18.3031	0
TEMOZOLOMIDE_PD325901_HT144	-2.30177	0
TEMOZOLOMIDE_PD325901_SW837	-5.9957	0
TEMOZOLOMIDE_PD325901_COLO320DM	-2.98586	0
TEMOZOLOMIDE_PD325901_UWB1289BRCA1	13.6978	0
TEMOZOLOMIDE_PD325901_HCT116	-12.891	0
TEMOZOLOMIDE_PD325901_NCIH460	6.87624	0
TEMOZOLOMIDE_PD325901_CAOV3	-16.869	0
TEMOZOLOMIDE_DASATINIB_LNCAP	11.6567	0
TEMOZOLOMIDE_DASATINIB_A375	-1.91762	0
TEMOZOLOMIDE_DASATINIB_NCIH1650	5.89755	0
TEMOZOLOMIDE_DASATINIB_SKOV3	-9.7832	0
TEMOZOLOMIDE_DASATINIB_OCUBM	-12.5356	0
TEMOZOLOMIDE_DASATINIB_A2058	35.8313	0
TEMOZOLOMIDE_DASATINIB_RKO	-31.0614	0
TEMOZOLOMIDE_DASATINIB_A427	75.3905	0
TEMOZOLOMIDE_DASATINIB_A2780	43.3653	0
TEMOZOLOMIDE_DASATINIB_SKMEL30	-19.648	0
TEMOZOLOMIDE_DASATINIB_HT29	-19.4868	0
TEMOZOLOMIDE_DASATINIB_NCIH520	21.9961	0
TEMOZOLOMIDE_DASATINIB_T47D	-48.8328	0
TEMOZOLOMIDE_DASATINIB_UACC62	-10.4524	0
TEMOZOLOMIDE_DASATINIB_SW620	42.1415	0
TEMOZOLOMIDE_DASATINIB_SKMES1	-3.71632	0
TEMOZOLOMIDE_DASATINIB_LOVO	12.5674	0
TEMOZOLOMIDE_DASATINIB_OVCAR3	45.8792	0
TEMOZOLOMIDE_DASATINIB_ZR751	-88.1019	0
TEMOZOLOMIDE_DASATINIB_SW837	-3.78105	0
TEMOZOLOMIDE_DASATINIB_NCIH2122	-93.7546	0
TEMOZOLOMIDE_DASATINIB_OV90	9.86646	0
TEMOZOLOMIDE_DASATINIB_COLO320DM	-8.11231	0
TEMOZOLOMIDE_DASATINIB_UWB1289BRCA1	0.243018	0
TEMOZOLOMIDE_DASATINIB_NCIH460	9.70297	0
TEMOZOLOMIDE_AZD1775_LNCAP	-3.76087	0
TEMOZOLOMIDE_AZD1775_KPL1	5.76328	0
TEMOZOLOMIDE_AZD1775_A375	14.6564	0
TEMOZOLOMIDE_AZD1775_NCIH1650	12.9475	0
TEMOZOLOMIDE_AZD1775_SKOV3	21.5821	0
TEMOZOLOMIDE_AZD1775_VCAP	24.6342	0
TEMOZOLOMIDE_AZD1775_RKO	6.76172	0
TEMOZOLOMIDE_AZD1775_A2780	14.642	0
TEMOZOLOMIDE_AZD1775_EFM192B	-29.4679	0
TEMOZOLOMIDE_AZD1775_SKMEL30	36.7068	0
TEMOZOLOMIDE_AZD1775_HT29	15.223	0
TEMOZOLOMIDE_AZD1775_NCIH520	7.34277	0
TEMOZOLOMIDE_AZD1775_PA1	11.8945	0
TEMOZOLOMIDE_AZD1775_SKMES1	30.418	0
TEMOZOLOMIDE_AZD1775_ES2	-0.106121	0
TEMOZOLOMIDE_AZD1775_MDAMB436	19.5108	0
TEMOZOLOMIDE_AZD1775_RPMI7951	27.8875	0
TEMOZOLOMIDE_AZD1775_OVCAR3	19.6023	0
TEMOZOLOMIDE_AZD1775_ZR751	-58.1546	0
TEMOZOLOMIDE_AZD1775_HT144	4.77252	0
TEMOZOLOMIDE_AZD1775_NCIH2122	3.12219	0
TEMOZOLOMIDE_AZD1775_OV90	4.41221	0
TEMOZOLOMIDE_AZD1775_NCIH23	0.795245	0
TEMOZOLOMIDE_AZD1775_UWB1289BRCA1	10.197	0
TEMOZOLOMIDE_AZD1775_HCT116	2.05321	0
TEMOZOLOMIDE_AZD1775_NCIH460	6.40109	0
TEMOZOLOMIDE_DOXORUBICIN_LNCAP	-9.90176	0
TEMOZOLOMIDE_DOXORUBICIN_A375	-5.91712	0
TEMOZOLOMIDE_DOXORUBICIN_DLD1	-1.52151	0
TEMOZOLOMIDE_DOXORUBICIN_NCIH1650	3.70401	0
TEMOZOLOMIDE_DOXORUBICIN_OCUBM	2.73092	0
TEMOZOLOMIDE_DOXORUBICIN_RKO	-0.410601	0
TEMOZOLOMIDE_DOXORUBICIN_A2780	2.1348	0
TEMOZOLOMIDE_DOXORUBICIN_SKMEL30	10.4881	0
TEMOZOLOMIDE_DOXORUBICIN_HT29	4.42571	0
TEMOZOLOMIDE_DOXORUBICIN_NCIH520	-4.91853	0
TEMOZOLOMIDE_DOXORUBICIN_PA1	-12.4561	0
TEMOZOLOMIDE_DOXORUBICIN_T47D	7.45848	0
TEMOZOLOMIDE_DOXORUBICIN_SW620	1.52446	0
TEMOZOLOMIDE_DOXORUBICIN_SKMES1	4.17142	0
TEMOZOLOMIDE_DOXORUBICIN_ES2	3.12068	0
TEMOZOLOMIDE_DOXORUBICIN_RPMI7951	-1.88901	0
TEMOZOLOMIDE_DOXORUBICIN_MSTO	-0.439918	0
TEMOZOLOMIDE_DOXORUBICIN_OVCAR3	-8.25125	0
TEMOZOLOMIDE_DOXORUBICIN_ZR751	-13.2773	0
TEMOZOLOMIDE_DOXORUBICIN_HT144	-1.1936	0
TEMOZOLOMIDE_DOXORUBICIN_SW837	-13.3218	0
TEMOZOLOMIDE_DOXORUBICIN_NCIH2122	-11.3087	0
TEMOZOLOMIDE_DOXORUBICIN_COLO320DM	11.7282	0
TEMOZOLOMIDE_DOXORUBICIN_NCIH23	4.38748	0
TEMOZOLOMIDE_DOXORUBICIN_CAOV3	-0.881178	0
TEMOZOLOMIDE_MRK-003_LNCAP	-1.09717	0
TEMOZOLOMIDE_MRK-003_A375	11.3378	0
TEMOZOLOMIDE_MRK-003_DLD1	1.09745	0
TEMOZOLOMIDE_MRK-003_NCIH1650	-17.8278	0
TEMOZOLOMIDE_MRK-003_RKO	-2.83046	0
TEMOZOLOMIDE_MRK-003_A427	29.3563	0
TEMOZOLOMIDE_MRK-003_A2780	8.6599	0
TEMOZOLOMIDE_MRK-003_EFM192B	-26.0095	0
TEMOZOLOMIDE_MRK-003_SKMEL30	22.1029	0
TEMOZOLOMIDE_MRK-003_HT29	11.9284	0
TEMOZOLOMIDE_MRK-003_PA1	24.4845	0
TEMOZOLOMIDE_MRK-003_T47D	-42.3076	0
TEMOZOLOMIDE_MRK-003_UACC62	6.36322	0
TEMOZOLOMIDE_MRK-003_SW620	6.03024	0
TEMOZOLOMIDE_MRK-003_SKMES1	4.8207	0
TEMOZOLOMIDE_MRK-003_MDAMB436	5.87308	0
TEMOZOLOMIDE_MRK-003_RPMI7951	29.1943	0
TEMOZOLOMIDE_MRK-003_LOVO	-8.39228	0
TEMOZOLOMIDE_MRK-003_MSTO	-6.58441	0
TEMOZOLOMIDE_MRK-003_HT144	-13.7018	0
TEMOZOLOMIDE_MRK-003_NCIH2122	-6.54811	0
TEMOZOLOMIDE_MRK-003_OV90	-1.60963	0
TEMOZOLOMIDE_MRK-003_COLO320DM	7.48801	0
TEMOZOLOMIDE_MRK-003_UWB1289BRCA1	9.7721	0
TEMOZOLOMIDE_MRK-003_HCT116	-3.07016	0
TEMOZOLOMIDE_MRK-003_NCIH460	-16.0979	0
TEMOZOLOMIDE_MRK-003_CAOV3	4.13659	0
TEMOZOLOMIDE_MRK-003_UWB1289	-3.40123	0
TEMOZOLOMIDE_GELDANAMYCIN_LNCAP	16.024	0
TEMOZOLOMIDE_GELDANAMYCIN_KPL1	-34.1184	0
TEMOZOLOMIDE_GELDANAMYCIN_A375	-6.3277	0
TEMOZOLOMIDE_GELDANAMYCIN_SKOV3	-28.6859	0
TEMOZOLOMIDE_GELDANAMYCIN_OCUBM	-13.8895	0
TEMOZOLOMIDE_GELDANAMYCIN_A2058	42.1119	0
TEMOZOLOMIDE_GELDANAMYCIN_RKO	-32.8521	0
TEMOZOLOMIDE_GELDANAMYCIN_A427	34.0867	0
TEMOZOLOMIDE_GELDANAMYCIN_A2780	-9.40537	0
TEMOZOLOMIDE_GELDANAMYCIN_EFM192B	-14.3606	0
TEMOZOLOMIDE_GELDANAMYCIN_NCIH520	-10.2861	0
TEMOZOLOMIDE_GELDANAMYCIN_UACC62	-18.9042	0
TEMOZOLOMIDE_GELDANAMYCIN_SW620	-2.32095	0
TEMOZOLOMIDE_GELDANAMYCIN_MDAMB436	8.60631	0
TEMOZOLOMIDE_GELDANAMYCIN_RPMI7951	-7.4032	0
TEMOZOLOMIDE_GELDANAMYCIN_MSTO	-16.0864	0
TEMOZOLOMIDE_GELDANAMYCIN_SW837	-26.1982	0
TEMOZOLOMIDE_GELDANAMYCIN_NCIH2122	-16.6611	0
TEMOZOLOMIDE_GELDANAMYCIN_OV90	-8.20876	0
TEMOZOLOMIDE_GELDANAMYCIN_COLO320DM	-2.4481	0
TEMOZOLOMIDE_GELDANAMYCIN_UWB1289BRCA1	-10.6445	0
TEMOZOLOMIDE_GELDANAMYCIN_HCT116	0.444994	0
TEMOZOLOMIDE_GELDANAMYCIN_NCIH460	-15.3475	0
TEMOZOLOMIDE_GELDANAMYCIN_CAOV3	-11.6155	0
TEMOZOLOMIDE_LAPATINIB_A375	19.1644	0
TEMOZOLOMIDE_LAPATINIB_DLD1	5.45981	0
TEMOZOLOMIDE_LAPATINIB_NCIH1650	-25.7801	0
TEMOZOLOMIDE_LAPATINIB_SKOV3	-12.1411	0
TEMOZOLOMIDE_LAPATINIB_VCAP	-6.40095	0
TEMOZOLOMIDE_LAPATINIB_OCUBM	-11.9495	0
TEMOZOLOMIDE_LAPATINIB_A2058	20.2645	0
TEMOZOLOMIDE_LAPATINIB_RKO	-7.3664	0
TEMOZOLOMIDE_LAPATINIB_A427	-4.00552	0
TEMOZOLOMIDE_LAPATINIB_A2780	22.4787	0
TEMOZOLOMIDE_LAPATINIB_SKMEL30	23.5185	0
TEMOZOLOMIDE_LAPATINIB_HT29	12.9304	0
TEMOZOLOMIDE_LAPATINIB_NCIH520	2.98774	0
TEMOZOLOMIDE_LAPATINIB_PA1	23.7164	0
TEMOZOLOMIDE_LAPATINIB_SKMES1	5.55194	0
TEMOZOLOMIDE_LAPATINIB_ES2	-3.5408	0
TEMOZOLOMIDE_LAPATINIB_RPMI7951	7.64995	0
TEMOZOLOMIDE_LAPATINIB_LOVO	6.0053	0
TEMOZOLOMIDE_LAPATINIB_MSTO	14.6563	0
TEMOZOLOMIDE_LAPATINIB_OVCAR3	22.7341	0
TEMOZOLOMIDE_LAPATINIB_ZR751	-40.7435	0
TEMOZOLOMIDE_LAPATINIB_HT144	4.31911	0
TEMOZOLOMIDE_LAPATINIB_NCIH2122	7.79863	0
TEMOZOLOMIDE_LAPATINIB_OV90	0.813193	0
TEMOZOLOMIDE_LAPATINIB_COLO320DM	1.58663	0
TEMOZOLOMIDE_LAPATINIB_NCIH23	2.17705	0
TEMOZOLOMIDE_LAPATINIB_HCT116	8.16945	0
TEMOZOLOMIDE_LAPATINIB_NCIH460	-1.91612	0
TEMOZOLOMIDE_LAPATINIB_CAOV3	4.28135	0
TEMOZOLOMIDE_ETOPOSIDE_KPL1	1.42301	0
TEMOZOLOMIDE_ETOPOSIDE_A375	-87.4802	0
TEMOZOLOMIDE_ETOPOSIDE_DLD1	-4.82214	0
TEMOZOLOMIDE_ETOPOSIDE_SKOV3	-5.36834	0
TEMOZOLOMIDE_ETOPOSIDE_VCAP	1.70459	0
TEMOZOLOMIDE_ETOPOSIDE_A2058	13.6477	0
TEMOZOLOMIDE_ETOPOSIDE_RKO	-3.13655	0
TEMOZOLOMIDE_ETOPOSIDE_A427	6.67588	0
TEMOZOLOMIDE_ETOPOSIDE_A2780	10.2094	0
TEMOZOLOMIDE_ETOPOSIDE_SKMEL30	21.1931	0
TEMOZOLOMIDE_ETOPOSIDE_HT29	7.02082	0
TEMOZOLOMIDE_ETOPOSIDE_NCIH520	-0.531958	0
TEMOZOLOMIDE_ETOPOSIDE_PA1	-13.0599	0
TEMOZOLOMIDE_ETOPOSIDE_T47D	-27.8283	0
TEMOZOLOMIDE_ETOPOSIDE_UACC62	12.5993	0
TEMOZOLOMIDE_ETOPOSIDE_SW620	17.5605	0
TEMOZOLOMIDE_ETOPOSIDE_SKMES1	25.0091	0
TEMOZOLOMIDE_ETOPOSIDE_ES2	11.8235	0
TEMOZOLOMIDE_ETOPOSIDE_MDAMB436	7.87387	0
TEMOZOLOMIDE_ETOPOSIDE_RPMI7951	12.896	0
TEMOZOLOMIDE_ETOPOSIDE_LOVO	-3.52212	0
TEMOZOLOMIDE_ETOPOSIDE_OVCAR3	0.813372	0
TEMOZOLOMIDE_ETOPOSIDE_HT144	-7.91868	0
TEMOZOLOMIDE_ETOPOSIDE_SW837	-18.6791	0
TEMOZOLOMIDE_ETOPOSIDE_NCIH2122	-5.74099	0
TEMOZOLOMIDE_ETOPOSIDE_OV90	13.7618	0
TEMOZOLOMIDE_ETOPOSIDE_COLO320DM	3.93863	0
TEMOZOLOMIDE_ETOPOSIDE_NCIH23	4.96033	0
TEMOZOLOMIDE_ETOPOSIDE_NCIH460	-9.81455	0
TEMOZOLOMIDE_ETOPOSIDE_CAOV3	83.0059	0
TEMOZOLOMIDE_VINORELBINE_KPL1	-27.6135	0
TEMOZOLOMIDE_VINORELBINE_A375	-87.0691	0
TEMOZOLOMIDE_VINORELBINE_DLD1	5.20914	0
TEMOZOLOMIDE_VINORELBINE_NCIH1650	-21.2751	0
TEMOZOLOMIDE_VINORELBINE_SKOV3	-13.226	0
TEMOZOLOMIDE_VINORELBINE_VCAP	-30.9532	0
TEMOZOLOMIDE_VINORELBINE_OCUBM	-29.6952	0
TEMOZOLOMIDE_VINORELBINE_A2058	-29.2218	0
TEMOZOLOMIDE_VINORELBINE_RKO	-10.8193	0
TEMOZOLOMIDE_VINORELBINE_A2780	-7.66666	0
TEMOZOLOMIDE_VINORELBINE_EFM192B	-28.0439	0
TEMOZOLOMIDE_VINORELBINE_SKMEL30	10.7839	0
TEMOZOLOMIDE_VINORELBINE_HT29	-25.5892	0
TEMOZOLOMIDE_VINORELBINE_NCIH520	-15.0468	0
TEMOZOLOMIDE_VINORELBINE_PA1	-28.2462	0
TEMOZOLOMIDE_VINORELBINE_T47D	-26.7374	0
TEMOZOLOMIDE_VINORELBINE_SW620	5.45483	0
TEMOZOLOMIDE_VINORELBINE_SKMES1	11.6043	0
TEMOZOLOMIDE_VINORELBINE_ES2	-8.30061	0
TEMOZOLOMIDE_VINORELBINE_MDAMB436	-2.87165	0
TEMOZOLOMIDE_VINORELBINE_RPMI7951	-14.4388	0
TEMOZOLOMIDE_VINORELBINE_MSTO	25.9907	0
TEMOZOLOMIDE_VINORELBINE_OVCAR3	-14.7276	0
TEMOZOLOMIDE_VINORELBINE_ZR751	-23.7669	0
TEMOZOLOMIDE_VINORELBINE_SW837	-3.37607	0
TEMOZOLOMIDE_VINORELBINE_OV90	32.6609	0
TEMOZOLOMIDE_VINORELBINE_NCIH23	-9.85946	0
TEMOZOLOMIDE_VINORELBINE_HCT116	-35.524	0
TEMOZOLOMIDE_VINORELBINE_NCIH460	-22.7366	0
TEMOZOLOMIDE_VINORELBINE_CAOV3	-56.0937	0
TEMOZOLOMIDE_VINBLASTINE_LNCAP	-59.71	0
TEMOZOLOMIDE_VINBLASTINE_NCIH1650	-44.153	0
TEMOZOLOMIDE_VINBLASTINE_SKOV3	-52.4632	0
TEMOZOLOMIDE_VINBLASTINE_OCUBM	-24.4404	0
TEMOZOLOMIDE_VINBLASTINE_A427	-35.1922	0
TEMOZOLOMIDE_VINBLASTINE_A2780	-56.2727	0
TEMOZOLOMIDE_VINBLASTINE_EFM192B	-51.0342	0
TEMOZOLOMIDE_VINBLASTINE_SKMEL30	-26.1557	0
TEMOZOLOMIDE_VINBLASTINE_HT29	-50.0458	0
TEMOZOLOMIDE_VINBLASTINE_NCIH520	-49.4423	0
TEMOZOLOMIDE_VINBLASTINE_PA1	-68.5685	0
TEMOZOLOMIDE_VINBLASTINE_T47D	-134.804	0
TEMOZOLOMIDE_VINBLASTINE_SW620	18.3107	0
TEMOZOLOMIDE_VINBLASTINE_SKMES1	-34.0132	0
TEMOZOLOMIDE_VINBLASTINE_ES2	7.55413	0
TEMOZOLOMIDE_VINBLASTINE_RPMI7951	-52.5723	0
TEMOZOLOMIDE_VINBLASTINE_MSTO	-28.443	0
TEMOZOLOMIDE_VINBLASTINE_ZR751	-109.614	0
TEMOZOLOMIDE_VINBLASTINE_HT144	-39.5161	0
TEMOZOLOMIDE_VINBLASTINE_SW837	-33.0459	0
TEMOZOLOMIDE_VINBLASTINE_COLO320DM	-3.78642	0
TEMOZOLOMIDE_VINBLASTINE_NCIH23	-61.874	0
TEMOZOLOMIDE_VINBLASTINE_UWB1289BRCA1	-6.96492	0
TEMOZOLOMIDE_VINBLASTINE_HCT116	-51.7158	0
TEMOZOLOMIDE_VINBLASTINE_CAOV3	-114.914	0
TEMOZOLOMIDE_VINBLASTINE_UWB1289	-15.1335	0
TEMOZOLOMIDE_PACLITAXEL_LNCAP	-18.7784	0
TEMOZOLOMIDE_PACLITAXEL_A375	7.47897	0
TEMOZOLOMIDE_PACLITAXEL_NCIH1650	-3.26851	0
TEMOZOLOMIDE_PACLITAXEL_VCAP	-2.61018	0
TEMOZOLOMIDE_PACLITAXEL_A2058	-12.6297	0
TEMOZOLOMIDE_PACLITAXEL_A427	14.568	0
TEMOZOLOMIDE_PACLITAXEL_A2780	-25.529	0
TEMOZOLOMIDE_PACLITAXEL_EFM192B	-25.8995	0
TEMOZOLOMIDE_PACLITAXEL_PA1	-2.81824	0
TEMOZOLOMIDE_PACLITAXEL_T47D	-50.6442	0
TEMOZOLOMIDE_PACLITAXEL_UACC62	2.90838	0
TEMOZOLOMIDE_PACLITAXEL_SW620	23.7708	0
TEMOZOLOMIDE_PACLITAXEL_SKMES1	24.7202	0
TEMOZOLOMIDE_PACLITAXEL_ES2	10.2947	0
TEMOZOLOMIDE_PACLITAXEL_MDAMB436	9.60749	0
TEMOZOLOMIDE_PACLITAXEL_RPMI7951	7.18961	0
TEMOZOLOMIDE_PACLITAXEL_HT144	-5.76537	0
TEMOZOLOMIDE_PACLITAXEL_SW837	-1.83892	0
TEMOZOLOMIDE_PACLITAXEL_NCIH2122	-237.582	0
TEMOZOLOMIDE_PACLITAXEL_OV90	4.26083	0
TEMOZOLOMIDE_PACLITAXEL_UWB1289BRCA1	24.1088	0
TEMOZOLOMIDE_PACLITAXEL_NCIH460	0.490427	0
TEMOZOLOMIDE_PACLITAXEL_CAOV3	-19.0811	0
TEMOZOLOMIDE_PACLITAXEL_UWB1289	-6.41188	0
TEMOZOLOMIDE_MK-8669_LNCAP	33.0033	0
TEMOZOLOMIDE_MK-8669_KPL1	66.0757	0
TEMOZOLOMIDE_MK-8669_A375	25.024	0
TEMOZOLOMIDE_MK-8669_DLD1	11.9859	0
[truncated: 31,575 more rows]

## Sheet: Compounds screened
Drug	SMILES	Target
METFORMIN	CN(C)C(=N)N=C(N)N	Q9Y478
5-FU,TYMS*	O=c1[nH]cc(F)c(=O)[nH]1	P04049,P01116,Q13239,P27986,Q99627,P10415,P25445,O15519,P51959,P30307,P24941,P10916,P06396,P21673,P19623,Q14802,P07355,P09525,P21802,P13569,P49368,P30084,Q13423,P62857,P61927,P62829,P18124,P12829,P08590,P05976,P24844,P60660,P14649,O14950,Q02045,P19105,Q01449,Q9BUA6
TEMOZOLOMIDE	Cn1nnc2c(C(N)=O)ncn2c1=O
ABT-888	CC1(c2nc3c(C(N)=O)cccc3[nH]2)CCCN1	P09874,Q9UGN5
CYCLOPHOSPHAMIDE	O=P1(N(CCCl)CCCl)NCCCO1	O75469
GEMCITABINE	Nc1ccn(C2OC(CO)C(O)C2(F)F)c(=O)n1	P23921,P04818,P30085
ZOLINZA,HDAC-4*	O=C(CCCCCCC(=O)Nc1ccccc1)NO	Q13547,Q92769,O15379,Q9UBN7,Q9BY41
MK-4827	NC(=O)c1cccc2cn(-c3ccc(C4CCCNC4)cc3)nc12	P09874,Q9UGN5
MITOMYCINE	COC12C(COC(N)=O)C3=C(C(=O)C(C)=C(N)C3=O)N1CC1NC12
CARBOPLATIN	N.N.O=C(O)C1(C(=O)O)CCC1.[Pt]
MK-8776	Cn1cc(-c2cnn3c(N)c(Br)c(C4CCCNC4)nc23)cn1	O14757
BORTEZOMIB,Proteasome*	CC(C)CC(NC(=O)C(Cc1ccccc1)NC(=O)c1cnccn1)B(O)O	P28074,P20618
SN-38	CCc1c2c(nc3ccc(O)cc13)-c1cc3c(c(=O)n1C2)COC(=O)C3(O)CC	P11387
DEXAMETHASONE	CC1CC2C3CCC4=CC(=O)C=CC4(C)C3(F)C(O)CC2(C)C1(O)C(=O)CO	P04150,P51843,P04083,P35228,P60321,O75469
ERLOTINIB	C#Cc1cccc(Nc2ncnc3cc(OCCOC)c(OCCOC)cc23)c1	P00533
DINACICLIB	CCc1cnn2c(NCc3ccc[n+]([O-])c3)cc(N3CCCCC3CCO)nc12	P06493,P24941,Q00535,P50750
SUNITINIB	CCN(CC)CCNC(=O)c1c(C)[nH]c(C=C2C(=O)Nc3ccc(F)cc32)c1C	P09619,P17948,P10721,P35968,P35916
OXALIPLATIN,FOLFOX*	NC1CCCCC1N.O=C(O)C(=O)O.[Pt+2]	P04637,Q07812,P07992,P18887,P18074,P10415,P33527,P09211,P09211
L778123	N#Cc1ccc(Cn2cncc2CN2CCN(c3cccc(Cl)c3)C(=O)C2)cc1	P49354,P49356
MK-2206,AKT-1*	NC1(c2ccc(-c3nc4ccn5c(=O)[nH]nc5c4cc3-c3ccccc3)cc2)CCC1	P42336,P48736
TOPOTECAN	CCC1(O)C(=O)OCc2c1cc1n(c2=O)Cc2cc3c(CN(C)C)c(O)ccc3nc2-1	P11387,Q969P6
MK-4541	CN1C(=O)C=CC2(C)C3CCC4(C)C(NC(=O)OCC(F)(F)F)CCC4C3CCC12	P10275
METHOTREXATE	CN(Cc1cnc2nc(N)nc(N)c2n1)c1ccc(C(=O)NC(CCC(=O)O)C(=O)O)cc1	P00374
MK-5108	O=C(O)C1(Cc2cccc(Nc3nccs3)n2)CCC(Oc2cccc(Cl)c2F)CC1	O14965
SORAFENIB	CNC(=O)c1cc(Oc2ccc(NC(=O)Nc3ccc(Cl)c(C(F)(F)F)c3)cc2)ccn1	P04049,P09619,P10721,P15056,P35916,P35968,P36888,P07949,P17948
BEZ-235	Cn1c(=O)n(-c2ccc(C(C)(C)C#N)cc2)c2c3cc(-c4cnc5ccccc5c4)ccc3ncc21	P42345,P42336,P48736
PD325901	O=C(NOCC(O)CO)c1ccc(F)c(F)c1Nc1ccc(I)cc1F	Q02750
DASATINIB	Cc1nc(Nc2ncc(C(=O)Nc3c(C)cccc3Cl)s2)cc(N2CCN(CCO)CC2)n1	P00519,P12931,P29317,P06239,P07947
AZD1775,WEE1*	C=CCn1c(=O)c2cnc(Nc3ccc(N4CCN(C)CC4)cc3)nc2n1-c1cccc(C(C)(C)O)n1	P30291
DOXORUBICIN	COc1cccc2c1C(=O)c1c(O)c3c(c(O)c1C2=O)CC(O)(C(=O)CO)CC3OC1CC(N)C(O)C(C)O1	P11388,isQ14978
MRK-003	O=S1(=O)NC2(CN1CC(F)(F)F)C1CCC2Cc2cc(C=CCN3CCC(C(F)(F)F)CC3)ccc2C1	Q96BI3,Q8WW43
GELDANAMYCIN	COC1=C2CC(C)CC(OC)C(O)C(C)C=C(C)C(OC(N)=O)C(OC)C=CC=C(C)C(=O)NC(=CC1=O)C2=O	P07900,P08238,P14625
LAPATINIB	CS(=O)(=O)CCNCc1ccc(-c2ccc3ncnc(Nc4ccc(OCc5cccc(F)c5)c(Cl)c4)c3c2)o1	P00533,P04626
ETOPOSIDE,TOP2-2*	COc1cc(C2c3cc4c(cc3C(OC3OC5COC(C)OC5C(O)C3O)C3COC(=O)C23)OCO4)cc(OC)c1O	P11388,Q02880
VINORELBINE	CCC1=CC2CN(C1)Cc1c([nH]c3ccccc13)C(C(=O)OC)(c1cc3c(cc1OC)N(C)C1C(O)(C(=O)OC)C(OC(C)=O)C4(CC)C=CCN5CCC31C54)C2	P07437
VINBLASTINE	CCC1(O)CC2CN(CCc3c([nH]c4ccccc34)C(C(=O)OC)(c3cc4c(cc3OC)N(C)C3C(O)(C(=O)OC)C(OC(C)=O)C5(CC)C=CCN6CCC43C65)C2)C1	Q71U36,P07437,Q9UJT1,P23258,Q9UJT0,P05412
PACLITAXEL	CC(=O)OC1C(=O)C2(C)C(O)CC3OCC3(OC(C)=O)C2C(OC(=O)c2ccccc2)C2(O)CC(OC(=O)C(O)C(NC(=O)c3ccccc3)c3ccccc3)C(C)=C1C2(C)C	P10415,P07437,Q9H4B7
MK-8669	COC1CC2CCC(C)C(O)(O2)C(=O)C(=O)N2CCCCC2C(=O)OC(C(C)CC2CCC(OP(C)(C)=O)C(OC)C2)CC(=O)C(C)C=C(C)C(O)C(OC)C(=O)C(C)CC(C)C=CC=CC=C1C	P42345
Oxaliplatin*	C1CC[C@H]([C@@H](C1)N)N	P04637,Q07812,P07992,P18887,P18074,P10415,P33527,P09211
Azacytidine*	C1=NC(=NC(=O)N1C2C(C(C(O2)CO)O)O)N	P26358
PIK3C-MTOR-2*	CCN1C2=NC(=NC(=C2C=C(C1=O)C3=CC=NN3)C)N	O00443,Q8NEB9,P42338,O00750,O75747,P42345
Cisplatin*	N.N.Cl[Pt+2]Cl	P29372,P01023,P02787,O00244
MTOR-4*	CC(C)N1C2=C(C(=N1)C3=CC4=C(C=C3)OC(=N4)N)C(=NC=N2)N	P42345
PIK3CA-3*	COc1cc(cnc1)Nc2cncc(n2)c3cnc4n3cccc4	P42336
Chloroquine*	CCN(CC)CCCC(C)NC1=C2C=CC(=CC2=NC=C1)Cl	P09210,P01375,Q9NR96,Q8MU52
BRAF-2*	C1CC(=NO)C2=C1C=C(C=C2)C3=CN(N=C3C4=CC=NC=C4)CCO	P15056
JAK*	Cc1cc(n[nH]1)Nc2c(cnc(n2)N[C@@H](C)c3ncc(cn3)F)Cl	P23458,O60674
CHEK1*	c1cc(cc(c1)F)c2cc(c(s2)C(=O)N[C@H]3CCCNC3)NC(=O)N	O14757
PIK3CA-2*	CS(=O)(=O)c1ccc(Nc2cncc(n2)c3cnc4ccccn34)cc1	P42336
MET-2*	O=C1NC(=O)[C@H]([C@@H]1C1=CNC2=CC=CC=C12)C1=CN2CCCC3=C2C1=CC=C3	P08581
ESR1-3*	CCC(=C(C1=CC=CC=C1)C2=CC=C(C=C2)OCCN(C)C)C3=CC=CC=C3	P03372,Q92731,Q15125,P10275,Q12809,O75469,P62508,P04278
MET*	c1cc2cc(ccc2nc1)Cn3c4c(ncc(n4)c5cnn(c5)CCO)nn3	P08581
HDAC1-HDAC3*	C1=CC=C(C(=C1)N)NC(=O)C2=CC=C(C=C2)CNC(=O)OCC3=CN=CC=C3	Q13547,O15379
PIM1*	c1ccc(cc1)c2cccc(c2N3CCC[C@H](C3)N)/C=C\4/C(=O)NC(=O)S4	P11309
ESR1-2*	CCC(=C(C1=CC=C(C=C1)O)C2=CC=C(C=C2)OCCN(C)C)C3=CC=CC=C3	P03372,Q92731,P62508,P04155,P11474,O75469,P04278
ESR1*	C[C@@H]1Cc2c3ccccc3[nH]c2[C@H](N1CC(C)C)c4ccc(cc4)/C=C/C(=O)O	P03372
PARP1-2*	COC1CCN(CC1)C(=O)c2cc(ccc2F)Cc3c4ccccc4c(=O)[nH]n3	P09874
IKBK*	c1cc(c(c(c1)OCC2CC2)c3cc(c4c(n3)NC(=O)OC4)C5CCCNC5)O	O15111,Q9ULZ3
ATR-1*	CS(=O)(=O)C1(CC1)c2cc(nc(n2)c3cccc4c3cc[nH]4)N5CCOCC5	Q13535
PTK2*	Cc1c(cn(n1)C)Nc2cc(c(cn2)C(F)(F)F)Nc3ccccc3C(=O)NC	Q14289,Q05397
HSP90*	CC(C)C1=C(C=C(C(=C1)C(=O)N2CC3=C(C2)C=C(C=C3)CN4CCN(CC4)C)O)O	P07900
PIK3C-2*	c1c(c(cnc1N)c2cc(nc(n2)N3CCOCC3)N4CCOCC4)C(F)(F)F	O00443,Q8NEB9,P42338,O00750,O75747
PIK3CB*	C[C@H](c1cc(cn2c1nc(cc2=O)N3CCOCC3)F)Nc4ccccc4C(=O)O	P42338
ATR-2*	C[C@@H]1COCCN1c2cc(nc(n2)c3cccc4c3cc[nH]4)C5(CC5)S(=O)(=O)C	Q13535
ATR-4*	C[C@@H]1COCCN1c2cc(nc(n2)c3ccnc4c3cc[nH]4)C5(CC5)[S@](=N)(=O)C	Q13535
TOP2*	c1ccc2c(c1)c3cccc(c3s2)c4cccc5c4oc(cc5=O)N6CCOCC6	P11388,Q02880,P78527
BCL2-3*	CC1=CC(=C(N1)C=C2C(=CC(=C3C=C4C=CC=CC4=N3)N2)OC)C.CS(=O)(=O)O	P10415
PI3KCD*	[H][C@@](CC)(NC1=NC=NC2=C1N=CN2)C1=NC2=CC=CC(F)=C2C(=O)N1C1=CC=CC=C1	O00329
WNT*	Cc1cc(ncc1c2ccc(cc2)c3[nH]c(=O)c4cccc(c4n3)CO)NCCOC	P04628,P09544,P56703,P56705,O95271
CSNK2A1-2*	CC(=O)Nc1cc(ccc1N(C)CCN)Nc2cc(n3c(n2)c(cn3)C#N)NC4CC4	P68400
CHK1*	C1CN2CCC1C(C2)NC3=C(C(=O)NC4=C3C=C(C=C4)Cl)C5=NC6=CC=CC=C6N5	O14757
IGFR-3*	C[C@@]1(O)C[C@@H](C1)c2nc(c3ccc4ccc(nc4c3)c5ccccc5)c6c(N)nccn26	P11717,P08069
PIK3C-MTOR*	[H][C@@]1(CC[C@@]([H])(CC1)N1C(=O)C(=CC2=C(C)NC(=N)N=C12)C1=CN=C(OC)C=C1)OCCO	O00443,Q8NEB9,P42338,O00750,O75747,P42345
AKT*	c1cc(ccc1[C@H](CCO)NC(=O)C2(CCN(CC2)c3c4cc[nH]c4ncn3)N)Cl	P31749,P31751,Q9Y243
PARP1*	c1ccc2c(c1)c(n[nH]c2=O)Cc3ccc(c(c3)C(=O)N4CCN(CC4)C(=O)C5CC5)F	P09874,Q9UGN5,Q9Y6F1
PTK2-2*	Cc1c(cn(n1)C)Nc2cc(c(cn2)C(F)(F)F)Nc3ccc(cc3C(=O)NOC)F	Q14289,Q05397
PIK3CA-4*	Cc1c(sc(n1)NC(=O)N2CCC[C@H]2C(=O)N)c3ccnc(c3)C(C)(C)C(F)(F)F	P42336
BIRC5*	CC1=[N+](C2=C(N1CCOC)C(=O)C3=CC=CC=C3C2=O)CC4=NC=CN=C4.[Br-]	O15392
NAE*	C1CC2=CC=CC=C2C1NC3=NC=NC4=C3C=CN4C5CC(C(C5)O)COS(=O)(=O)N	Q13564
EGFR-2*	COc1cc2c(cc1OCCCN3CCOCC3)c(ncn2)Nc4ccc(c(c4)Cl)F	P00533
CSNK2A1*	CC(=O)Nc1cc(ccc1N(C)CCN(C)C)Nc2cc(n3c(n2)c(cn3)C#N)NC4CC4	P68400
ALK-IGFR*	COc1cc(ccc1Nc2ncc(c(n2)c3c[nH]c4c3cccc4)Cl)N5CCC(CC5)N	Q9UM73,P11717,P08069,
MET-ALK*	C[C@H](c1c(ccc(c1Cl)F)Cl)Oc2cc(cnc2N)c3cnn(c3)C4CCNCC4	P08581,Q9UM73
VEGF*	COC1=CC2=C(C=C1OCCCN1CCCC1)N=CN=C2OC1=C(F)C2=C(NC(C)=C2)C=C1	P35968,P17948,P35916
TTK*	Cn1c2cnc(nc2n(c1=O)C3CCCC3)Nc4ccc(cc4OC)OC5CCN(CC5)C	P33981
BRAF-M2*	CC1=C(C=C(C=C1)C(=O)NC2=CC(=NC=C2)C(F)(F)F)NC3=CC4=C(C=C3)N=CN(C4=O)C	P15056
MAP2K-2*	OCCONC(=O)c1ccc2cncn2c1Nc3ccc(I)cc3F	Q02750,P36507,P45985,P52564,O14733,Q13163,P46734
PIK3CB-PIK3CD*	CC(c1cc(cc2c1oc(cc2=O)N3CCOCC3)C(=O)N(C)C)Nc4cc(cc(c4)F)F	P42338,O00329
MAP2K-1*	Cn1cnc2c1cc(c(c2F)Nc3ccc(cc3Cl)Br)C(=O)NOCCO	Q02750,P36507
AKT-SGK*	COc1cc2c(cc1OC)C3(CCN(CC3)c4c5c([nH]nc5Br)ncn4)C[C@H]2N	P31749,O00141,Q96BR1,Q9HBY8
AKT-PIK3C*	CCCCCCCCCCCCCCCCCCOP(=O)([O-])OC1CC[N+](CC1)(C)C	P31749,P28482,P17252,O00443,Q8NEB9,O00750,P42338,O75747,
FASN*	c1cc(ccc1c2ccc3c(c2)cco3)c4nc5cnccc5n4C[C@@H]6CCN(C6)C(=O)C7CC7	P49327
MTOR-1*	C[C@H]1COCCN1c2c3ccc(nc3nc(n2)N4CCOC[C@@H]4C)c5cccc(c5)C(=O)NC	P42345
IGFR-2*	COc1cc(ccc1Nc2ncc(c(n2)c3cnc4n3cccc4)F)N5CCN(CC5)CCO	P11717,P08069
FGFR*	C[C@@H]1CN(C[C@@H](N1)C)c2ccc(cc2)C(=O)Nc3cc(n[nH]3)CCc4cc(cc(c4)OC)OC	P11362,P21802,P22607
AR*	CNC(=O)c1ccc(cc1F)N2C(=S)N(C(=O)C2(C)C)c3ccc(C#N)c(c3)C(F)(F)F	P10275
MTOR*	C[C@H]1COCCN1c2c3ccc(nc3nc(n2)N4CCOC[C@@H]4C)c5ccc(c(c5)CO)OC	P42345
gSEC*	CC(C)(C(=O)NCC(C(F)(F)F)(F)F)C(=O)NC1C2=CC=CC=C2C3=CC=CC=C3NC1=O
SYK*	CC1(C(=O)Nc2c(ccc(n2)Nc3c(cnc(n3)Nc4cc(c(c(c4)OC)OC)OC)F)O1)C	P43405
MAP2K-RAF*	CC1=C(C(=O)OC2=C1C=CC(=C2)OC3=NC=CC=N3)CC4=C(C(=NC=C4)NS(=O)(=O)NC)F	Q02750,P36507,P04049,P15056
ERBB*	CNC(=O)CN1CCC(CC1)Oc2cc3c(cc2OC)ncnc3Nc4cccc(c4F)Cl	P00533,P04626,Q15303
TKI*	CN1CCC(CC1)COc2cc3c(cc2OC)c(ncn3)Nc4ccc(cc4F)Br	P15692,P00533,Q13882,Q02763,P07949,P35968
TKI-2*	CNC(=O)C1=CC(OC2=CC(F)=C(NC(=O)NC3=CC=C(Cl)C(=C3)C(F)(F)F)C=C2)=CC=N1	P17948,P35968,P35916,P10721,P16234,P09619,P11362,P21802,Q02763,Q16832,P04629,P29317,P04049,P15056,Q15759,P42685,P00519,P07949
FGFR4*	CNC(=O)[C@@H](Cc1cccs1)Nc2nccc(n2)c3cnc4n3cccc4OCc5ccccc5	P22455
EGFR*	CN(C)C/C=C/C(=O)Nc1cc2c(cc1O[C@H]3CCOC3)ncnc2Nc4ccc(c(c4)Cl)F	P00533,P04626,Q15303
BRAF-M*	CCCS(=O)(=O)Nc1ccc(F)c(C(=O)c2c[nH]c3ncc(cc23)c4cccc(c4)C(=O)N)c1F	P15056
TNKS-PARP6*	C[C@H]1Cn2c(nnc2C(C)(F)F)CN1C(=O)c3cccc(c3)C(c4c5ccccc5c(=O)[nH]n4)(F)F	O95271,Q2NL67
EG5*	CC1=CC=C(C=C1)C(=O)N(CCCN)C(C2=NC3=C(C(=NS3)C)C(=O)N2CC4=CC=CC=C4)C(C)C	P52732
IGFR-4*	C[C@H](C(=O)N1CCC(CC1)c2ccc(c(c2)OC)Nc3ncc(c(n3)c4cnc5n4cccc5)Cl)O	P11717,P08069
PIK3C*	CS(=O)(=O)N1CCN(CC1)Cc2cc3c(s2)c(nc(n3)c4cccc5c4cn[nH]5)N6CCOCC6	O00443,Q8NEB9,P42338,O00750,O75747
PRKC*	CN1C=C(C2=CC=CC=C12)C1=C(C(=O)NC1=O)C1=CN(C2CCN(CC3=CC=CC=N3)CC2)C2=CC=CC=C12	P05771,Q96GD4,O14965,Q96Q40,O14757,O96017,P31749,P27986
BRAF-VEGFR2*	CN1C2=C(C=C(C=C2)OC3=CC(=NC=C3)C4=NC=C(N4)C(F)(F)F)N=C1NC5=CC=C(C=C5)C(F)(F)F	P15056,P35968
AR-1*	CC(=O)N1CCN(CCOc2ccc(cc2)C3CCN(CC3)C4=Nn5c(CC4)nnc5C(F)(F)F)CC1	P10275
ALK*	CN1CCN(CC1)C2CCN(CC2)c3ccc(c(c3)OC)Nc4ncc(c(n4)c5c[nH]c6c5cccc6)Cl	Q9UM73
ALK-2*	CN1CCN(CC1)C2CCN(CC2)c3ccc(c(c3)OC)Nc4ncc(c(n4)c5cnn6c5cccc6)Cl	Q9UM73
SRC*	CN1CCN(CC1)CCOc2cc3c(c(c2)OC4CCOCC4)c(ncn3)Nc5c(ccc6c5OCO6)Cl	P12931
ATM*	C[C@@H]1CN(C[C@@H](O1)C)CC(=O)Nc2ccc3c(c2)Cc4cccc(c4S3)c5cc(=O)cc(o5)N6CCOCC6	Q13315
PRKDC-2*	CCN1CCN(CC1)CC(=O)Nc2ccc(c3c2c4ccccc4s3)c5cccc6c5oc(cc6=O)N7CCOCC7	P78527
FOLFIRI*	CCC1=C2CN3C(=CC4=C(COC(=O)[C@]4(O)CC)C3=O)C2=NC2=CC=C(OC(=O)N3CCC(CC3)N3CCCCC3)C=C12	P11387,Q969P6
ESR1-1*	[H][C@@]12CC[C@H](O)[C@@]1(C)CC[C@]1([H])C3=CC=C(O)C=C3C[C@@H](CCCCCCCCCS(=O)CCCC(F)(F)C(F)(F)F)[C@@]21[H]	P03372
MAP2K-3*	Cc1c2c(c(n(c1=O)C)Nc3ccc(cc3F)I)c(=O)n(c(=O)n2c4cccc(c4)NC(=O)C)C5CC5	Q02750,P36507,P45985,P52564,O14733,Q13163,P46734
MAP2K*	CN1C(=O)C(C)=C2N(C(=O)N(C3CC3)C(=O)C2=C1NC1=CC=C(I)C=C1F)C1=CC(NC(C)=O)=CC=C1	Q02750,P36507
FNTA-FNTB*	C1CN(CCC1CC(=O)N2CCC(CC2)C3C4=C(C=C(C=C4CCC5=CC(=CN=C35)Br)Cl)Br)C(=O)N	P49354,P49356,P17936
BCL2L1*	CN(C)CC#Cc1ccc(OCCCc2sc(nc2C(=O)O)N3CCc4cccc(C(=O)Nc5nc6ccccc6s5)c4C3)cc1	Q07817
Proteasome-2*	CC(C)C[C@H](NC(=O)[C@H](CCC1=CC=CC=C1)NC(=O)CN1CCOCC1)C(=O)N[C@@H](CC1=CC=CC=C1)C(=O)N[C@@H](CC(C)C)C(=O)[C@@]1(C)CO1	P28074,P28062,P20618,P28065,P49721,P40306
Docetaxel*	CC1=C2C(C(=O)C3(C(CC4C(C3C(C(C2(C)C)(CC1OC(=O)C(C(c5ccccc5)NC(=O)OC(C)(C)C)O)O)OC(=O)c6ccccc6)(CO4)OC(=O)C)O)C)O	Q9H4B7,P10415,P11137,P27816,P10636,O75469
BCL2-2*	CN1CCC(CC1)Nc2ccc(cc2N(=O)=O)S(=O)(=O)NC(=O)c3ccc(cc3Oc4ccc5[nH]ccc5c4)N6CCN(CC7=C(CCC(C)(C)C7)c8ccc(Cl)cc8)CC6	P10415
IAP-2*	C[C@H]([C@@H](C(=O)N[C@@H](C)C(=O)N[C@@H]1CCCc2c1cccc2)NC(=O)[C@H](C)NC)OCCCCCCO[C@H](C)[C@@H](C(=O)N[C@@H](C)C(=O)N[C@@H]3CCCc4c3cccc4)NC(=O)[C@H](C)NC	P98170,Q13490,Q13489
BCL2-BCL2L1*	CN(CC[C@H](CSc1ccccc1)Nc2ccc(cc2S(=O)(=O)C(F)(F)F)S(=O)(=O)NC(=O)c3ccc(cc3)N4CCC(CC4)[C@H](c5ccccc5c6ccc(cc6)Cl)O)CCO	P10415,Q07817
MTOR-3*	[H][C@@]1(C[C@@H](C)[C@]2([H])CC(=O)[C@H](C)\C=C(C)\[C@@H](O)[C@@H](OC)C(=O)[C@H](C)C[C@H](C)\C=C\C=C\C=C(C)\[C@H](C[C@]3([H])CC[C@@H](C)[C@@](O)(O3)C(=O)C(=O)N3CCCC[C@@]3([H])C(=O)O2)OC)CC[C@@H](OCCO)[C@@H](C1)OC	P42345
BCL2*	CC1(CCC(=C(C1)CN2CCN(CC2)c3ccc(cc3)C(=O)NS(=O)(=O)c4ccc(c(c4)S(=O)(=O)C(F)(F)F)N[C@H](CCN5CCOCC5)CSc6ccccc6)c7ccc(cc7)Cl)C	P10415
BCL2-BCL2L1-BCL2L2*	CC1(CCC(=C(C1)CN2CCN(CC2)C3=CC=C(C=C3)C(=O)NS(=O)(=O)C4=CC(=C(C=C4)NC(CCN5CCOCC5)CSC6=CC=CC=C6)S(=O)(=O)C(F)(F)F)C7=CC=C(C=C7)Cl)C	P10415,Q07817,Q92843,Q92934
MTOR-5*	CO[C@@H]1C[C@H](C[C@@H](C)[C@@H]2CC(=O)[C@H](C)\C=C(C)\[C@@H](O)[C@@H](OC)C(=O)[C@H](C)C[C@H](C)\C=C\C=C\C=C(C)\[C@H](C[C@@H]3CC[C@@H](C)[C@@](O)(O3)C(=O)C(=O)N3CCCC[C@H]3C(=O)O2)OC)CC[C@H]1OP(C)(C)=O	P42345
IAP*	C[C@@H](C(=O)N[C@@H](C1CCCCC1)C(=O)N2CCC[C@H]2C(=O)N[C@H]3c4ccccc4C[C@H]3OCC#CC#CCO[C@@H]5Cc6ccccc6[C@@H]5NC(=O)[C@@H]7CCCN7C(=O)[C@H](C8CCCCC8)NC(=O)[C@H](C)NC)NC	P98170,Q13490,Q13489
MTOR-2*	OCC(C)(CO)C(=O)O[C@@H]1CC[C@@H](C[C@@H](C)[C@]2([H])CC(=O)[C@H](C)\C=C(C)\[C@@H](O)[C@@H](OC)C(=O)[C@H](C)C[C@H](C)\C=C\C=C\C=C(C)\[C@@H](OC)C[C@]3([H])CC[C@@H](C)[C@@](O)(O3)C(=O)C(=O)N3CCCC[C@H]3C(=O)O2)C[C@H]1OC	P42345

## Sheet: Cancer cell lines
Supplementary Table 4. A&O dataset.
Tissue	Number_Of_Cell_Lines	Cell_Lines
Stomach	1	KATOIII
Haematopoietic_And_Lymphoid_Tissue	1	KMS11
Colon	1	COLO320DM
Melanoma	1	A2058
Prostate	3	LNCAP,VCAP,22RV1
Skin	7	C32,COLO741,A375,SKMEL30,UACC62,RPMI7951,HT144
Ovary	9	SKOV3,A2780,PA1,ES2,OVCAR3,OV90,UWB1289BRCA1,CAOV3,UWB1289
Large_Intestine	13	COLO205,NCIH747,HCT116,HT29,LS513,RKO,SW403,SW837,SW948,SW48,SW620,DLD1,LOVO
Urinary_Tract	13	647V,BFTC905,HT1197,HT1376,J82,RT112,SW780,T24,UMUC3,VMCUB1,KU1919,JMSU1,RT4
Lung	30	A549,CALU1,CALU6,DMS114,NCIH1299,NCIH1437,NCIH1563,NCIH1703,NCIH1793,NCIH1975,NCIH2085,NCIH2126,NCIH2170,NCIH2228,NCIH2291,NCIH23,NCIH322,NCIH358,NCIH520,NCIH522,NCIH838,SW900,NCIH226,CALU3,NCIH1650,A427,SKMES1,MSTO,NCIH2122,NCIH460
Breast	37	BT20,BT549,CAL148,CAL51,CAMA1,HCC1187,HCC1395,HCC1806,HCC1937,HCC38,HCC70,HS578T,MDAMB157,MDAMB231,MDAMB436,MDAMB453,MDAMB468,ZR751,CAL120,DU4475,HCC1143,HCC1428,BT474,HCC1419,HCC1500,KPL1,MCF7,MDAMB134VI,MDAMB361,T47D,UACC812,MDAMB175VII,HCC1569,MDAMB415,HCC1954,OCUBM,EFM192B
Total	116
